# Supplementary material for: Suvorexant for Primary Insomnia: A Systematic Review and Meta-Analysis of Randomized Placebo-Controlled Trials
Source: PubMed Central journal article supplement (PMC4552781; doi:10.1371/journal.pone.0136910), 2015-08-28

S1 Fig. Forest plots of efficacy secondary outcomes.

S1-1 Fig. Subjective total sleep time (minutes) at Week 1

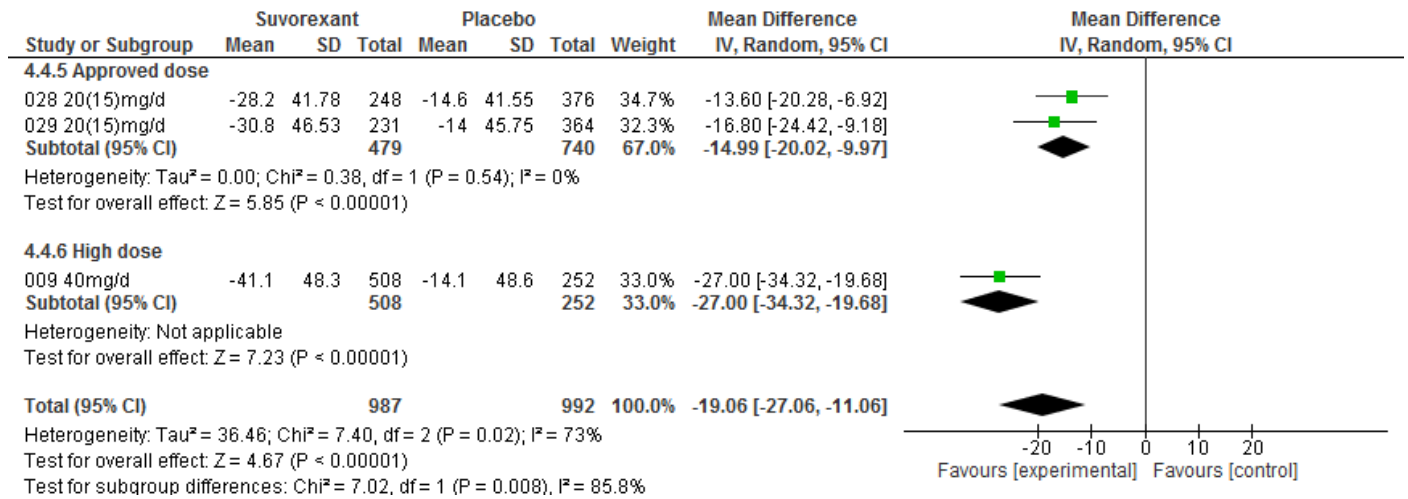

S1-2 Fig. Subjective total sleep time (minutes) at Month 1

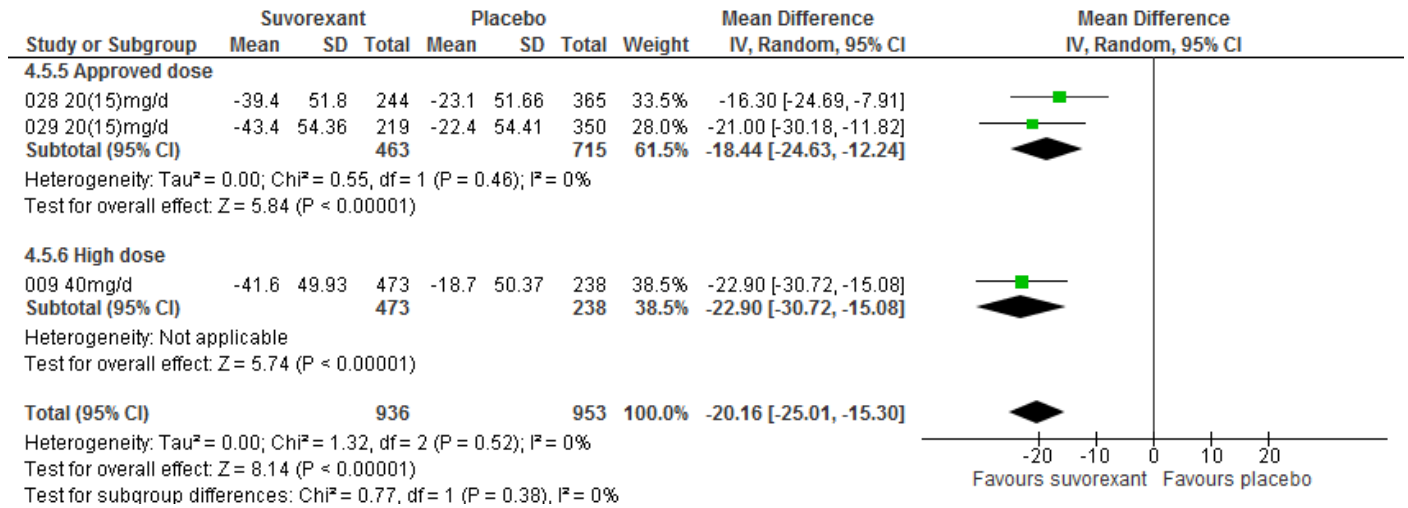

S1-3 Fig. Subjective total sleep time (minutes) at Month 3

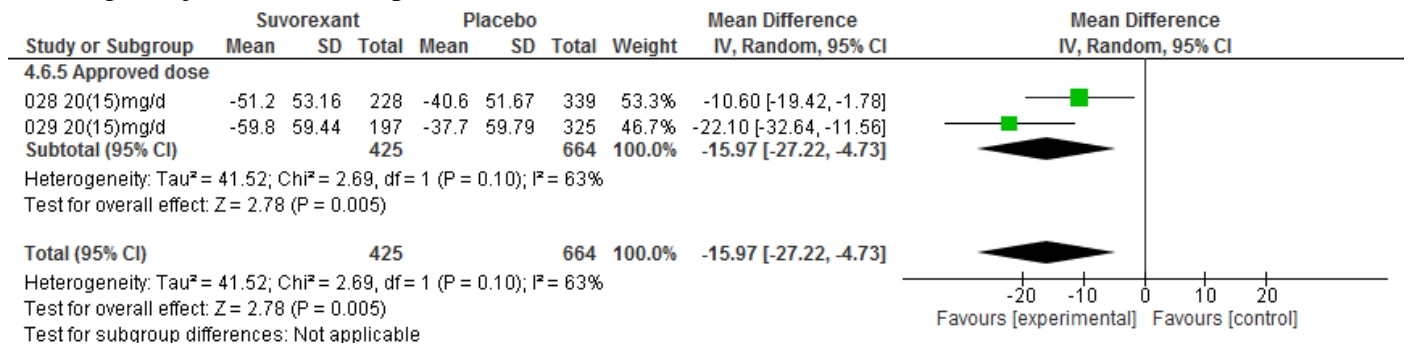

S1-4 Fig. Subjective time to sleep onset (minutes) at Week 1

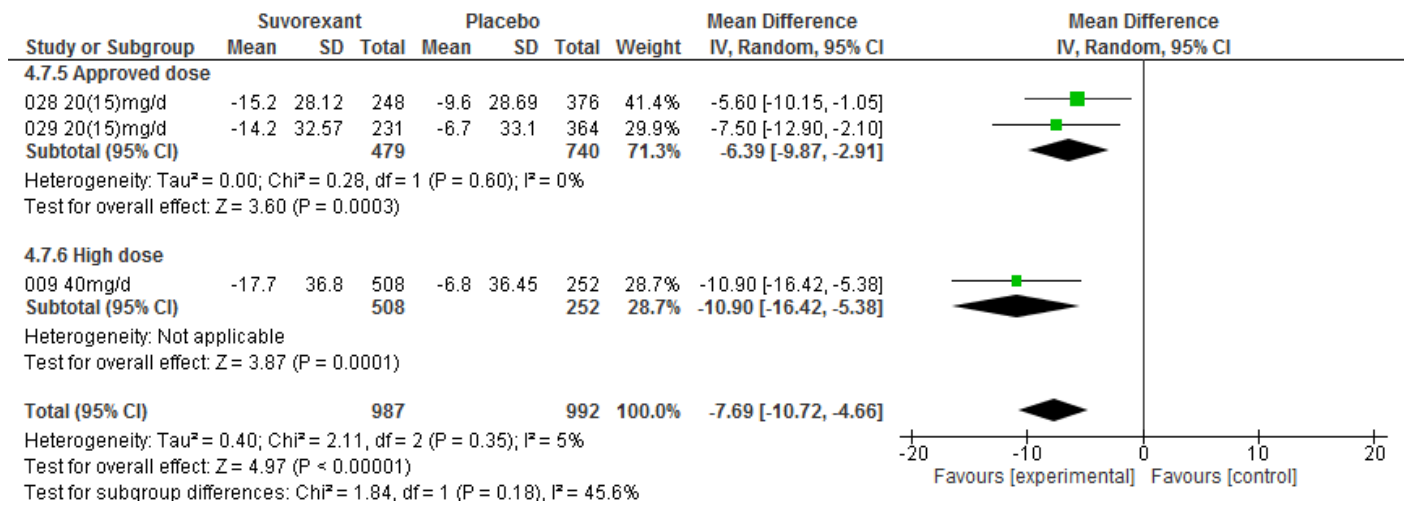

S1-5 Fig. Subjective time to sleep onset (minutes) at Month 1

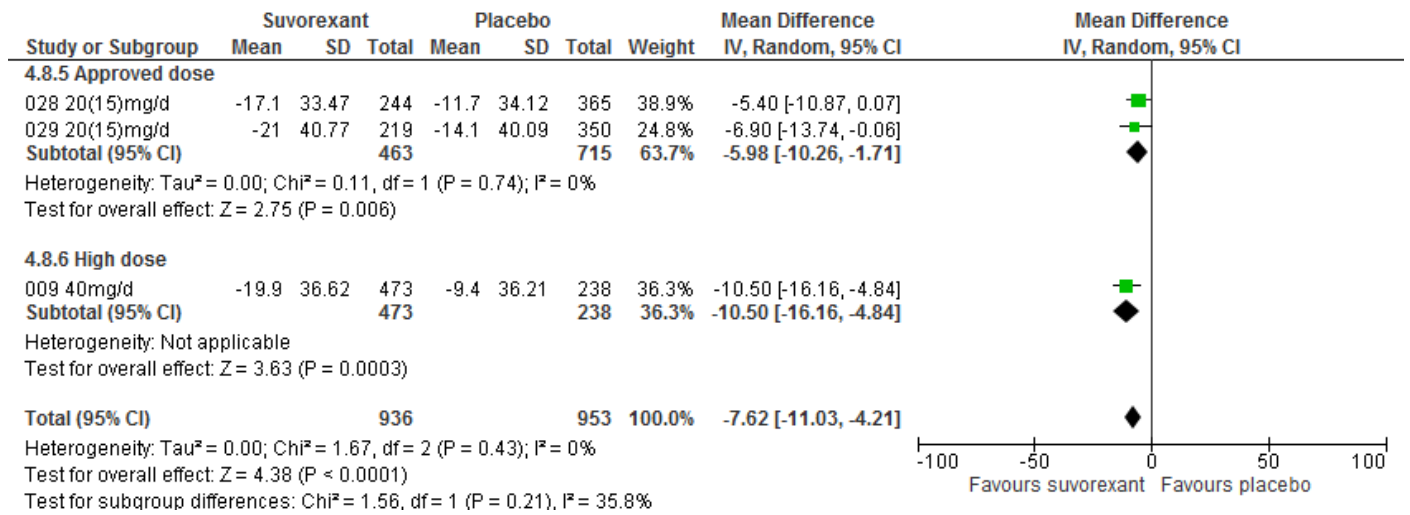

S1-6 Fig. Subjective time to sleep onset (minutes) at Month 3

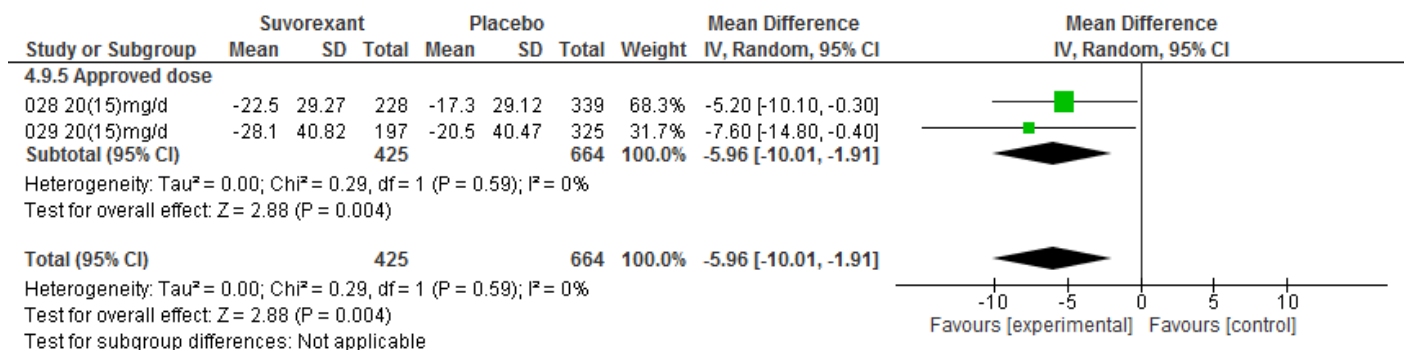

S1-7 Fig. Subjective wake after sleep onset (minutes) at Week 1

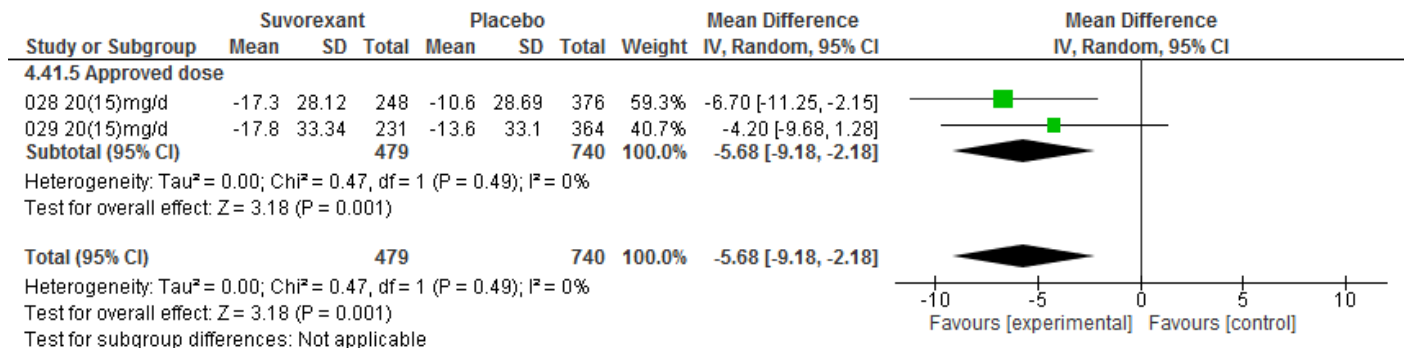

S1-8 Fig. Subjective wake after sleep onset (minutes) at Month 1

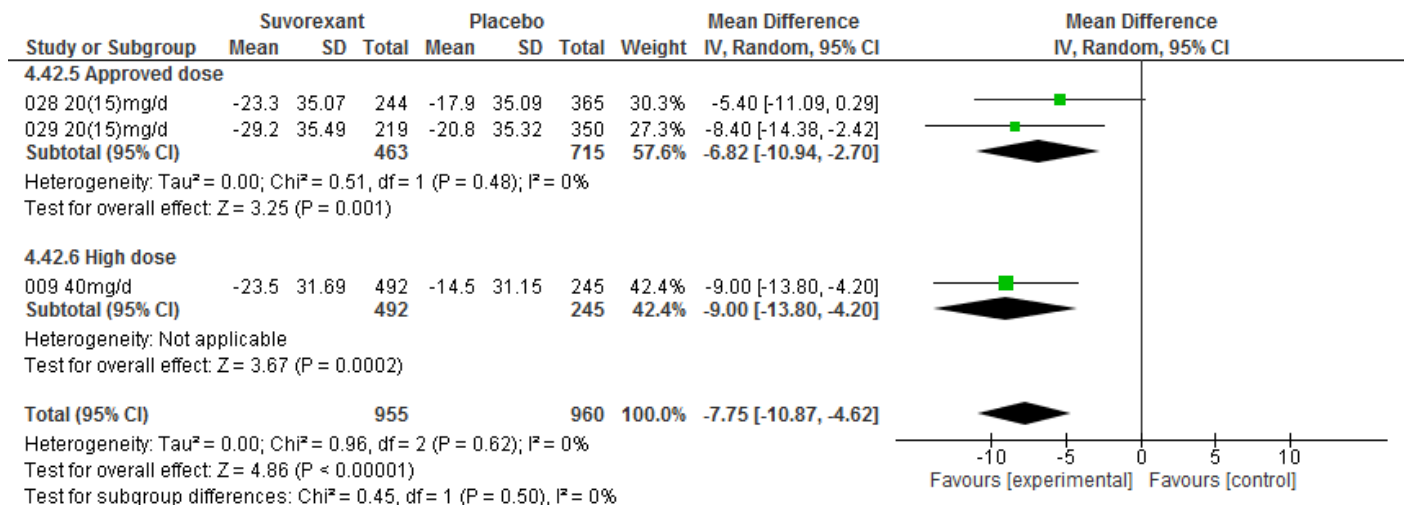

S1-9 Fig. Subjective wake after sleep onset (minutes) at Month 3

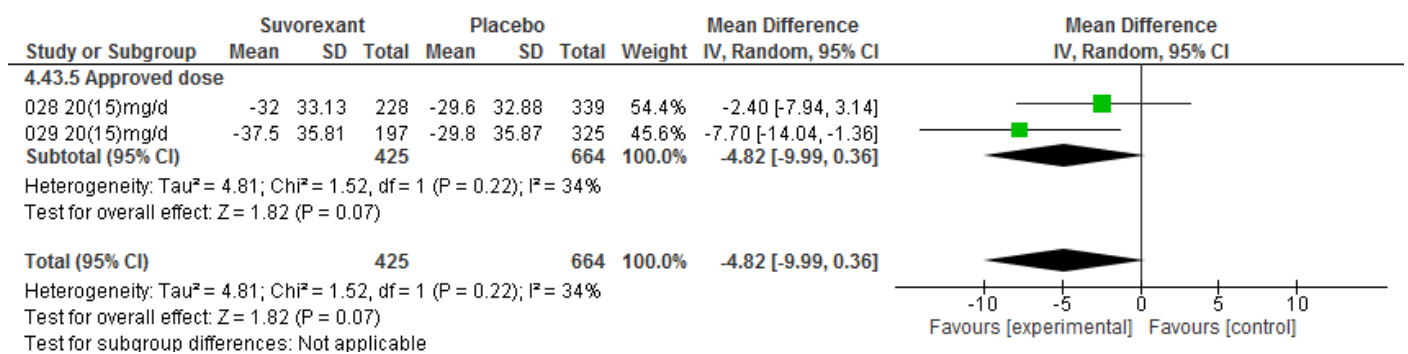

S1-10 Fig. Subjective quality of sleep (1–4 scale) at Week 1

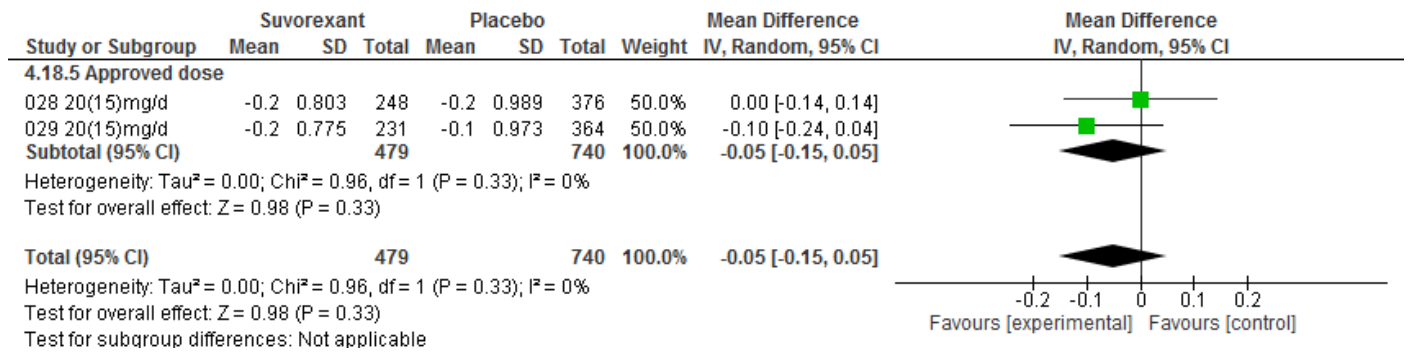

S1-11 Fig. Subjective quality of sleep (1–4 scale) at Month 1

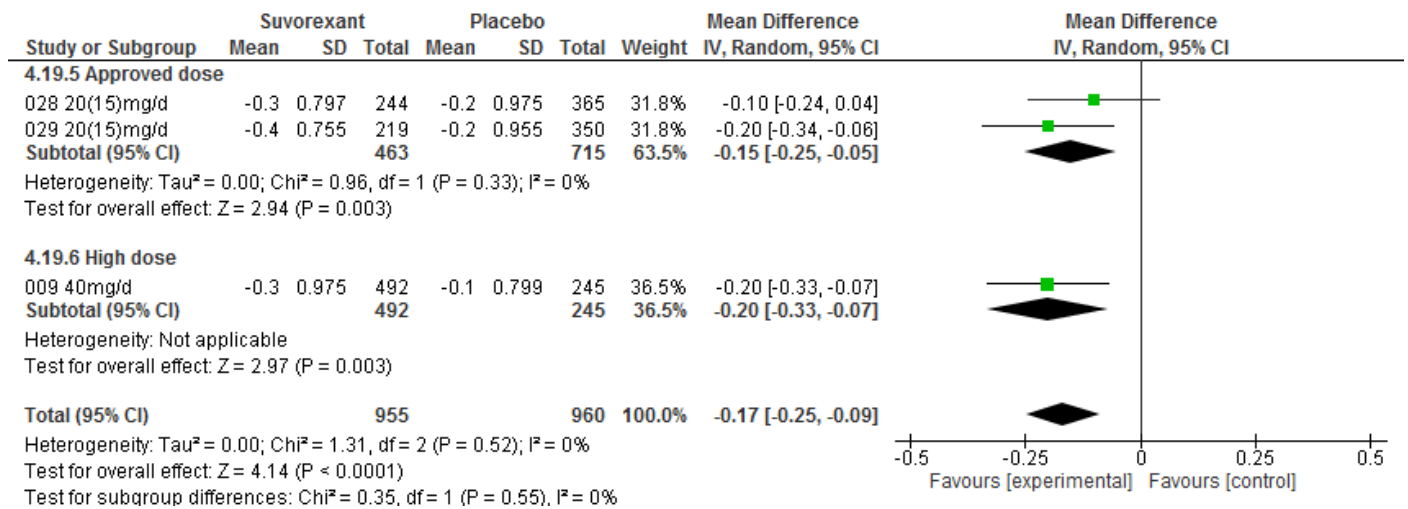

S1-12 Fig. Subjective quality of sleep (1–4 scale) at Month 3

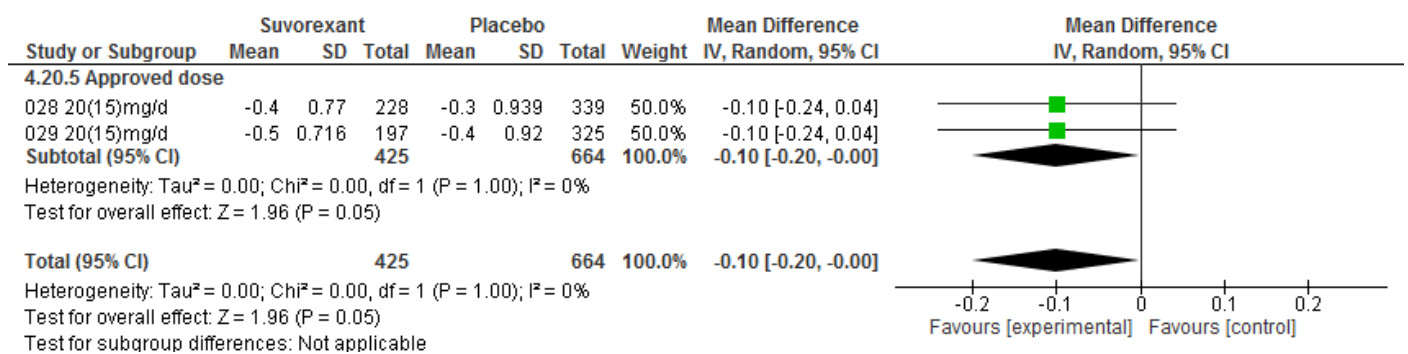

S1-13 Fig. Subjective refreshed feeling on waking (0–4 scale) at Month 1

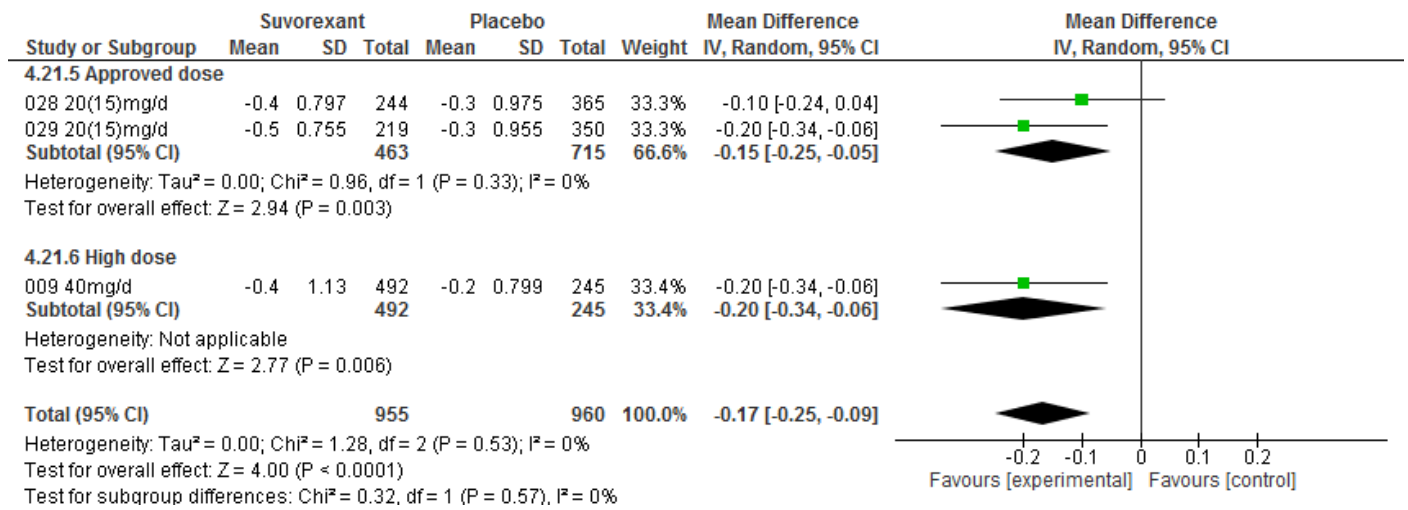

S1-14 Fig. Subjective refreshed feeling on waking (0–4 scale) at Month 3

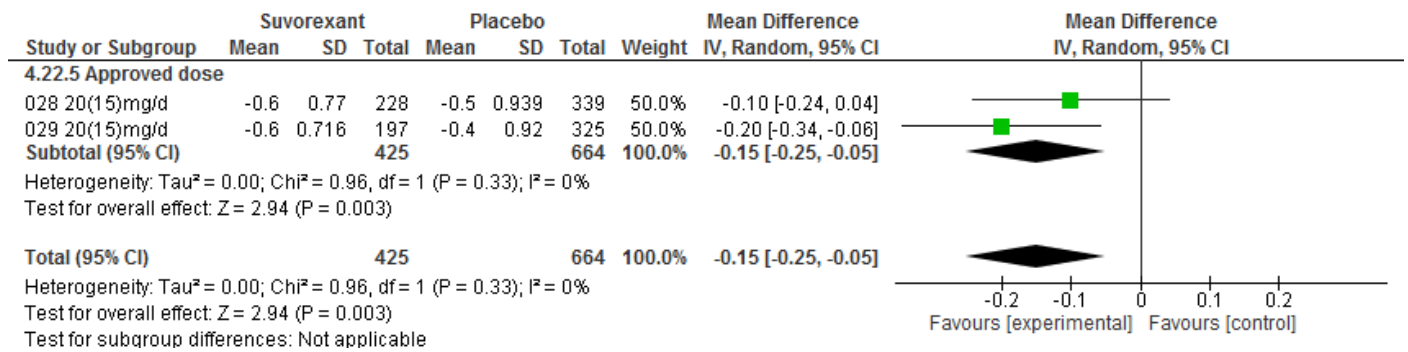

S1-15 Fig. Subjective number of awakenings at Week 1

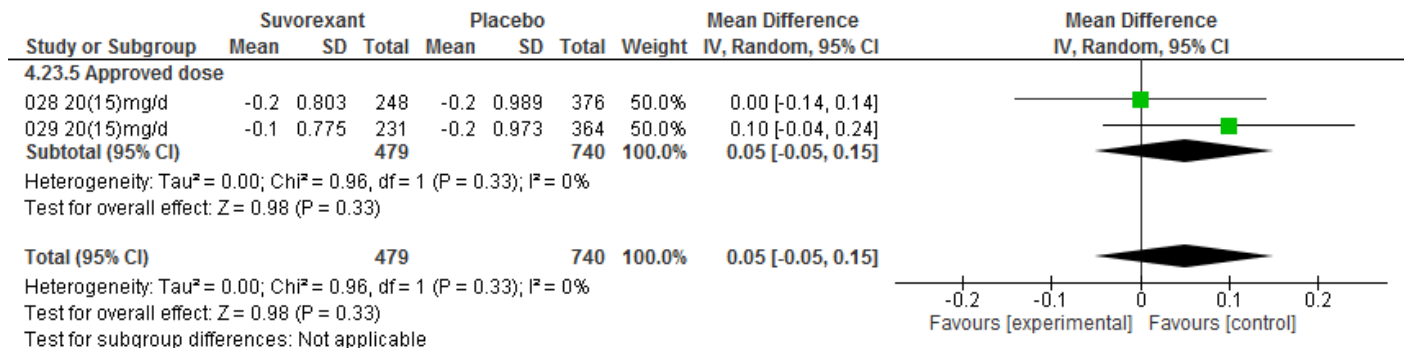

S1-16 Fig. Subjective number of awakenings at Month 1

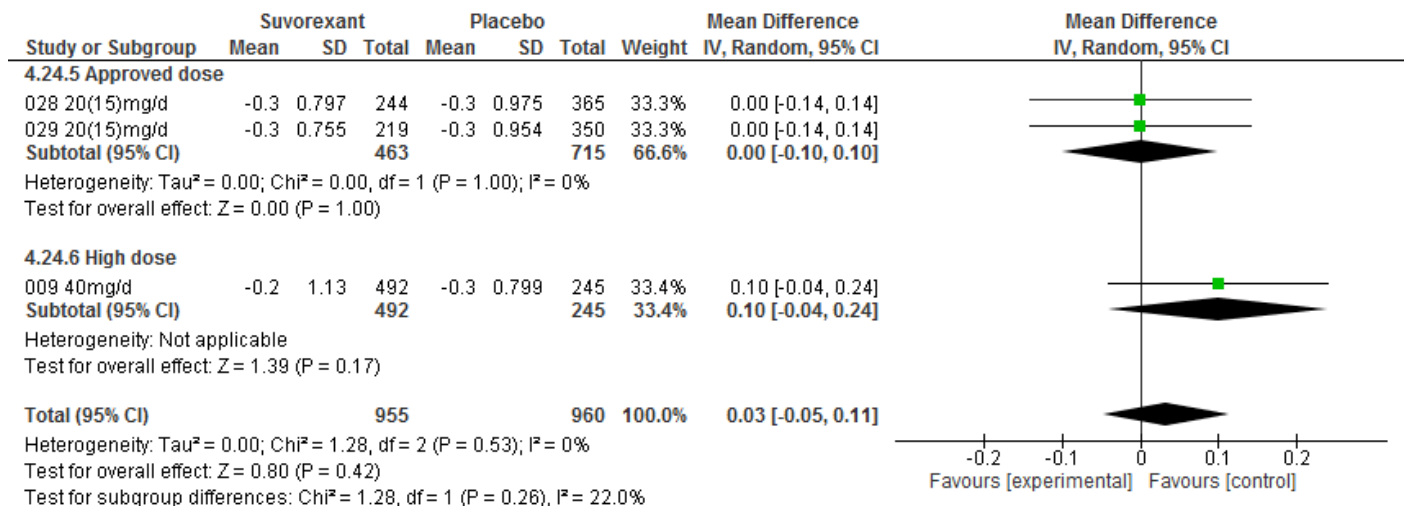

S1-17 Fig. Subjective number of awakenings at Month 3

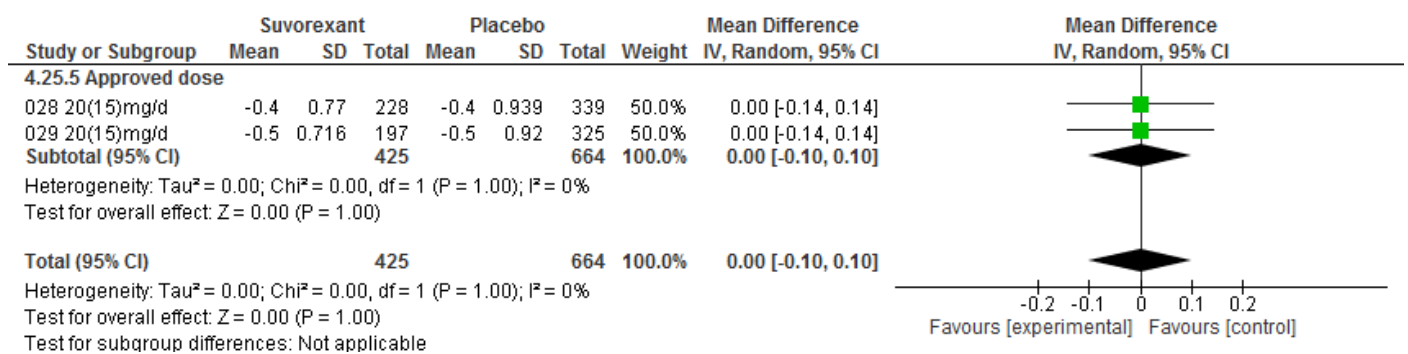

S1-18 Fig. Insomnia Severity Index (0–28 scale) at Month 1

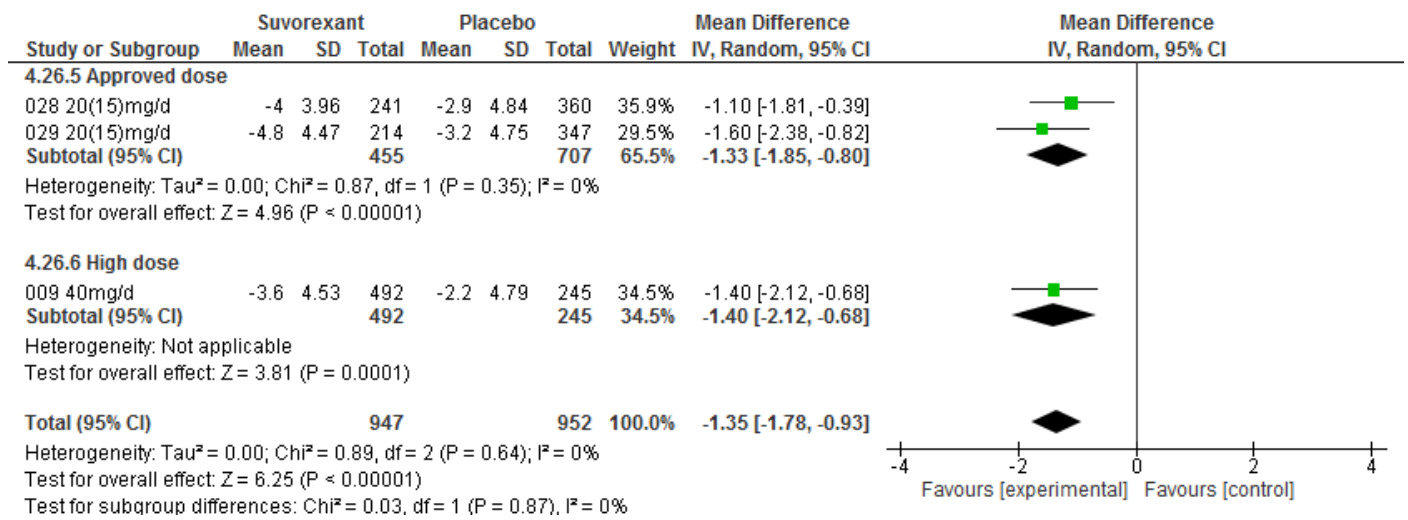

S1-19 Fig. Insomnia Severity Index (0–28 scale) at Month 3

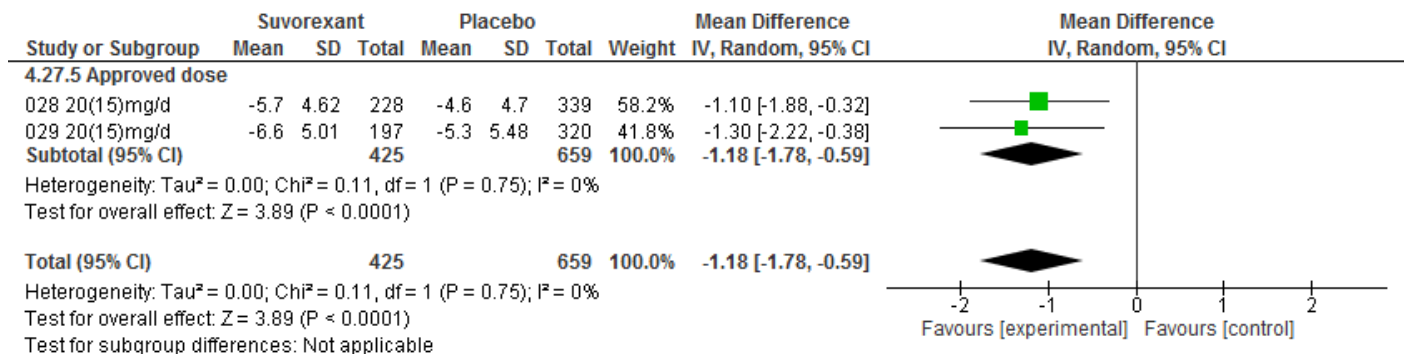

S1-20 Fig. Clinical Global Impression-Severity scale (1–7 scale) at Week 2

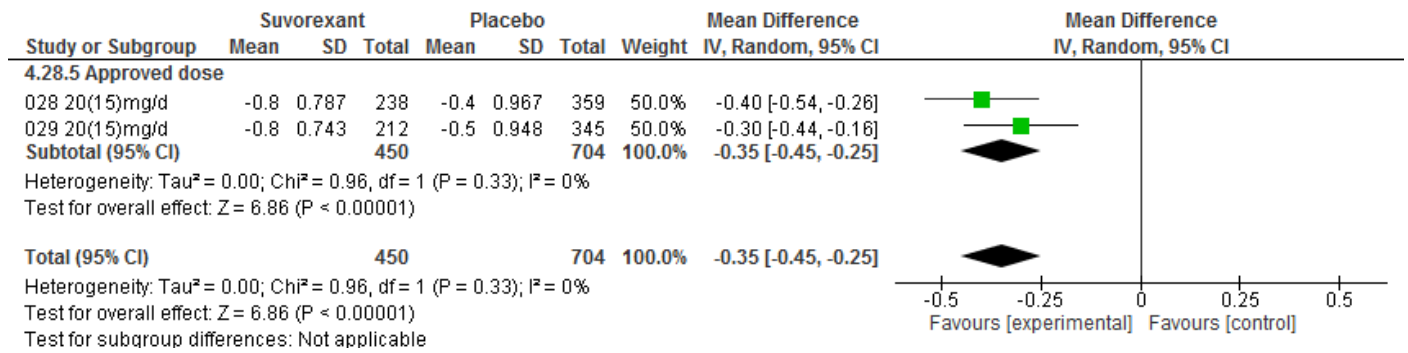

S1-21 Fig. Clinical Global Impression-Severity scale (1–7 scale) at Month 1

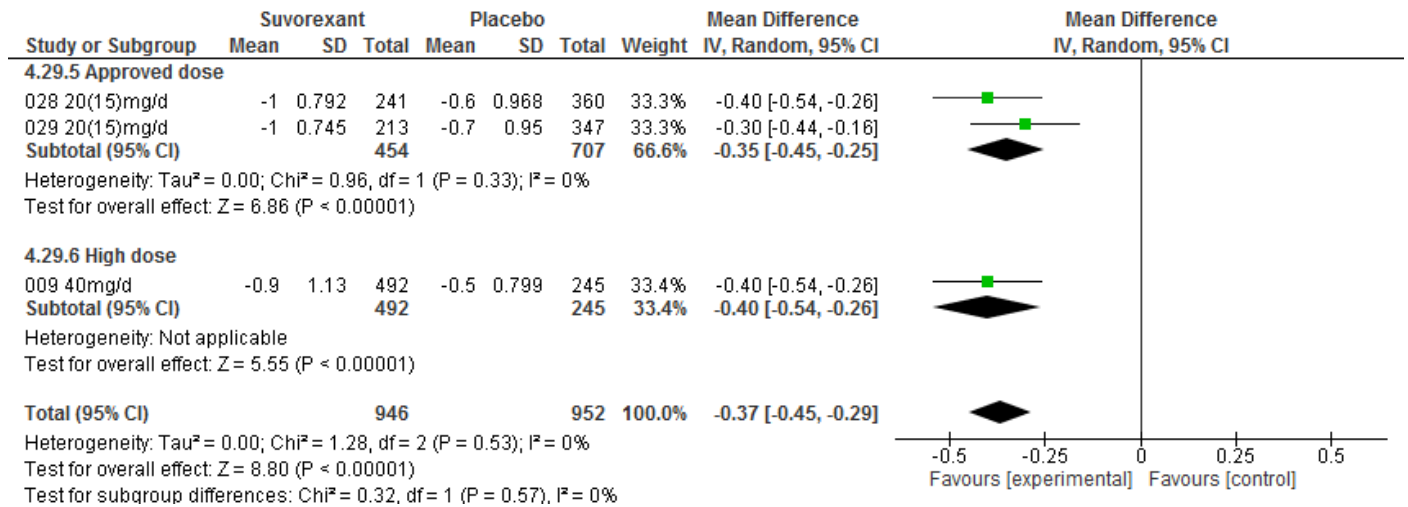

S1-22 Fig. Clinical Global Impression-Severity scale (1–7 scale) at Month 3

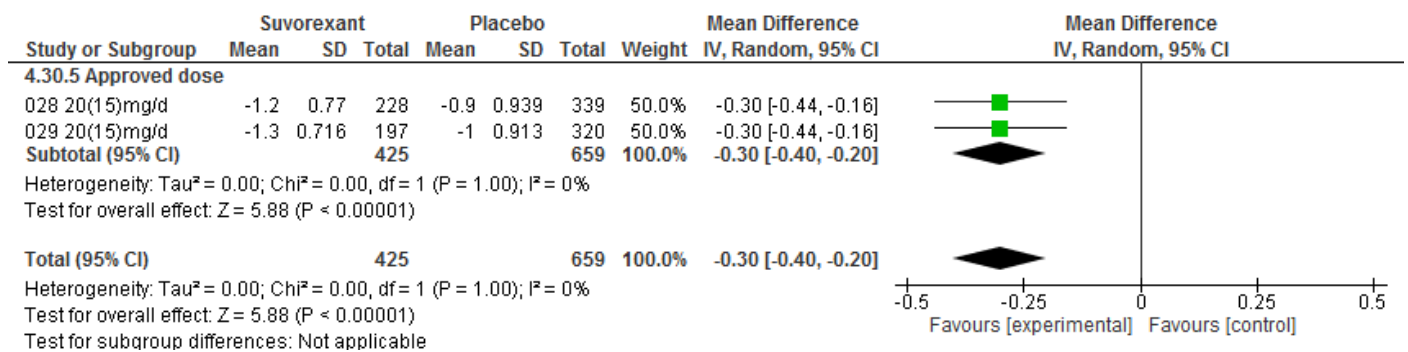



S1-23 Fig. Patient Global Impression-Severity scale (0–5 scale) at Week 2

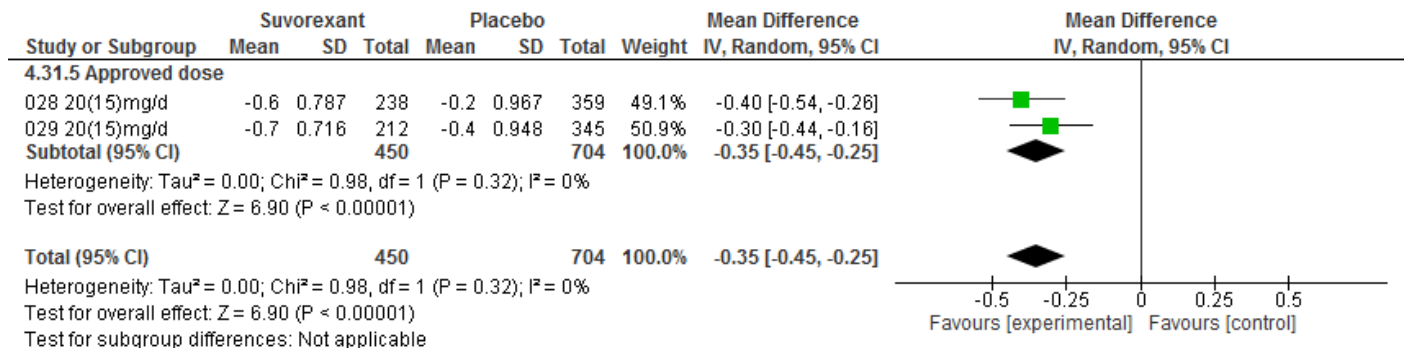

S1-24 Fig. Patient Global Impression-Severity scale (0–5 scale) at Month 1

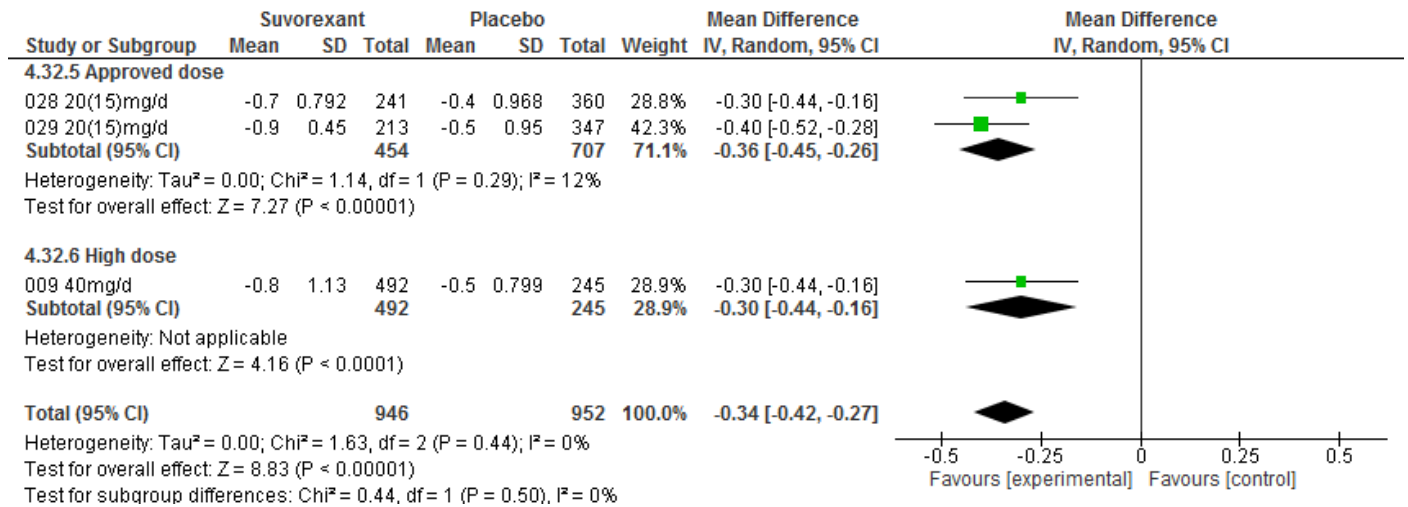

S1-25 Fig. Patient Global Impression-Severity scale (0–5 scale) at Month 3

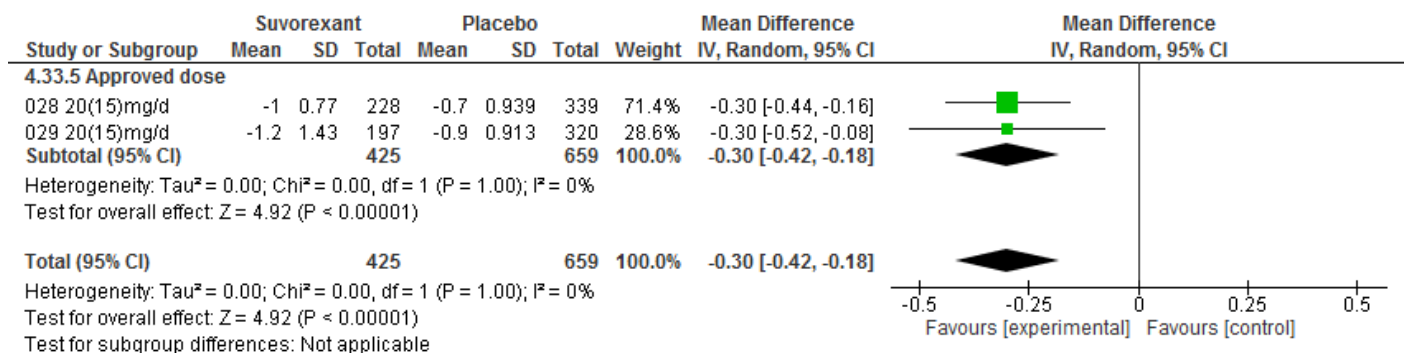

S1-26 Fig. Clinical Global Impression-Improvement scale (1–7 scale) at Week 2

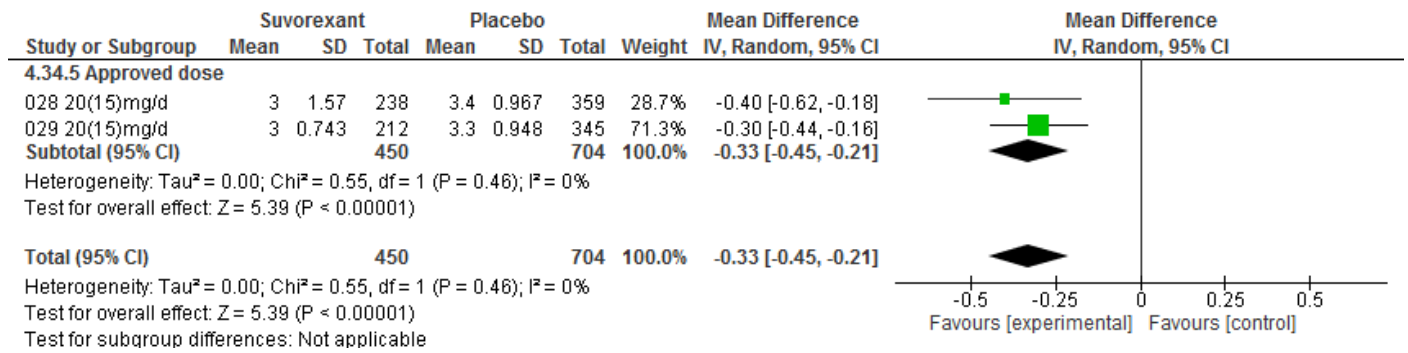

S1-27 Fig. Clinical Global Impression-Improvement scale (1–7 scale) at Month 1

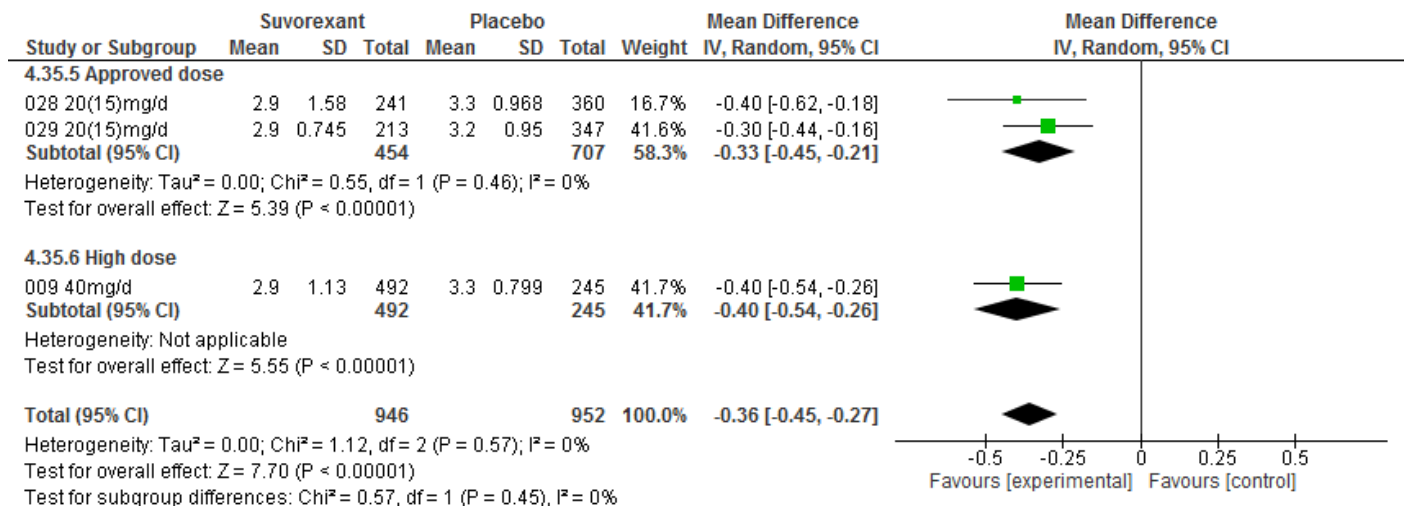

S1-28 Fig. Clinical Global Impression-Improvement scale (1–7 scale) at Month 3

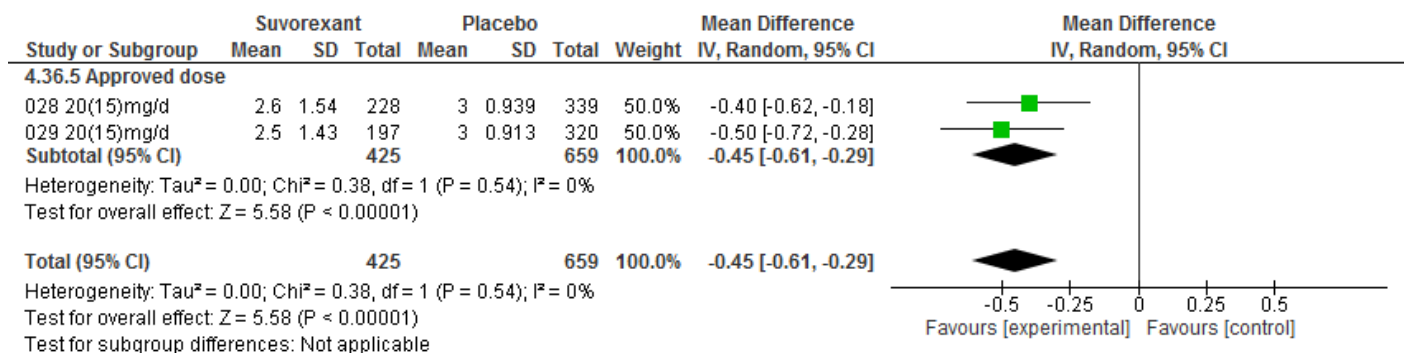

S1-29 Fig. Patient Global Impression-Improvement scale (1–7 scale) at Week 2

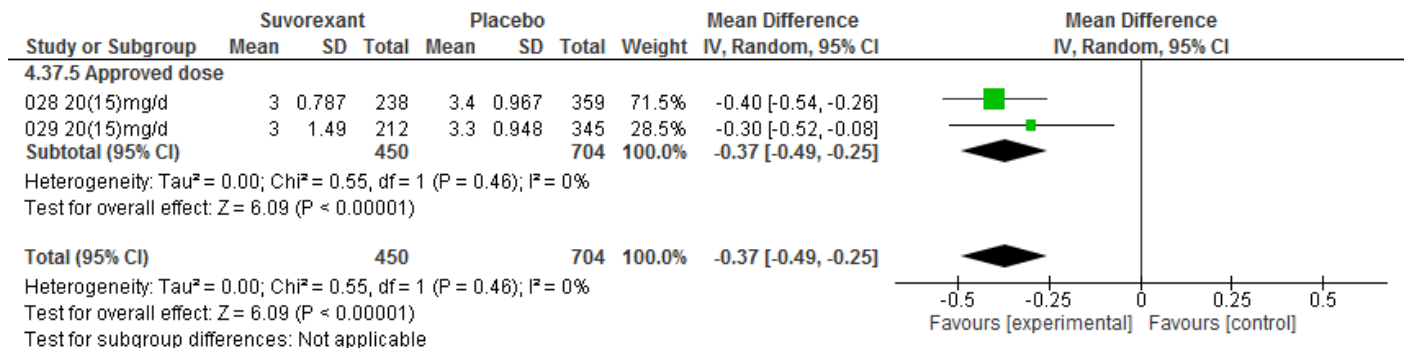

S1-30 Fig. Patient Global Impression-Improvement scale (1–7 scale) at Month 1

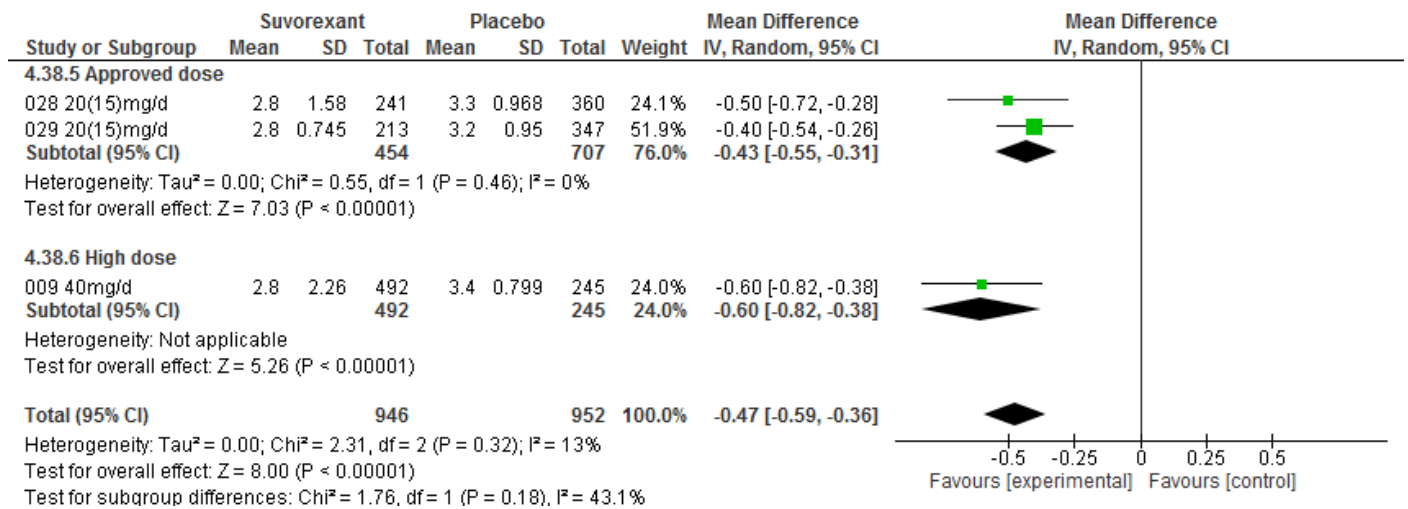

S1-31 Fig. Patient Global Impression-Improvement scale (1–7 scale) at Month 3

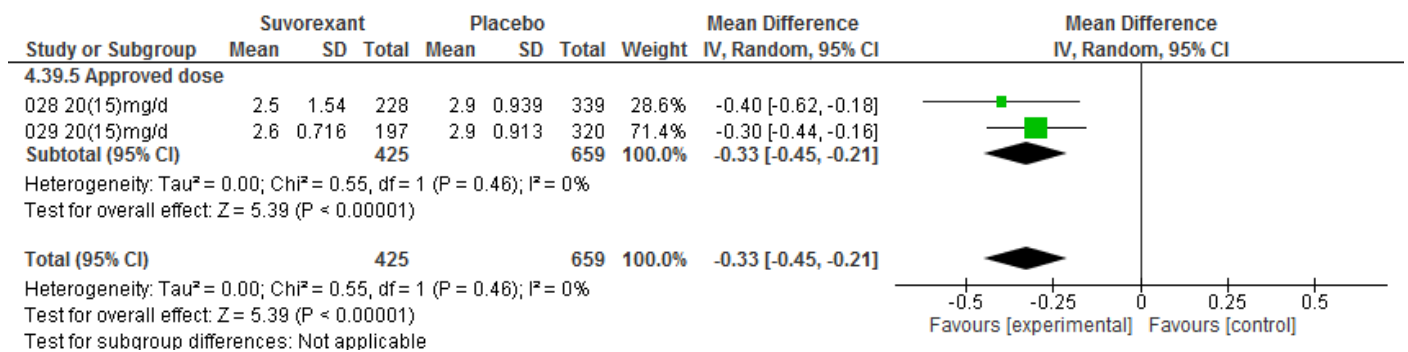

S1-32 Fig. Response rate at Month 3

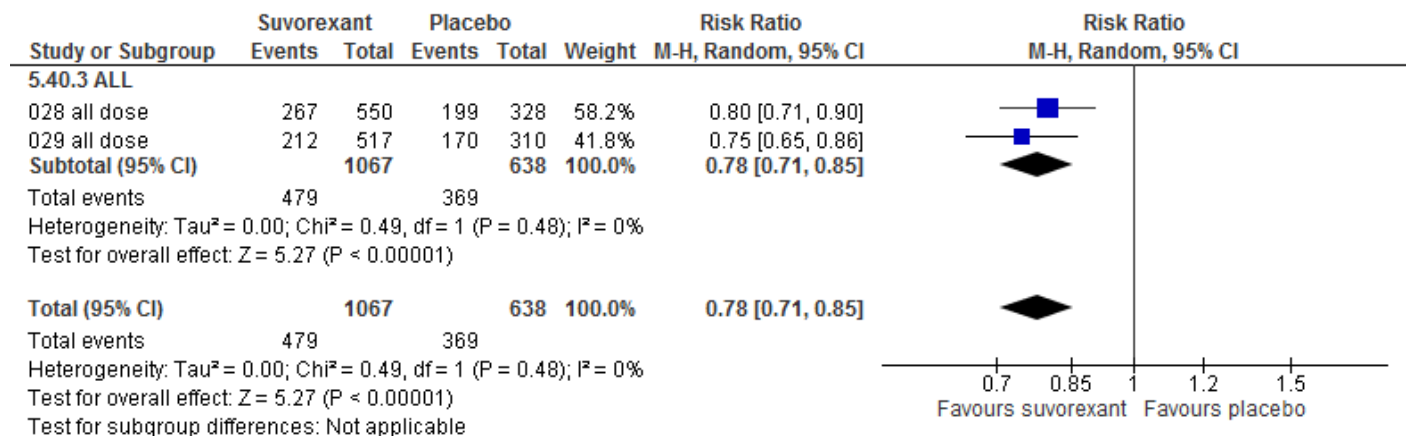

S1-33 Fig. Latency to onset of persistent sleep (minutes) at Day 1

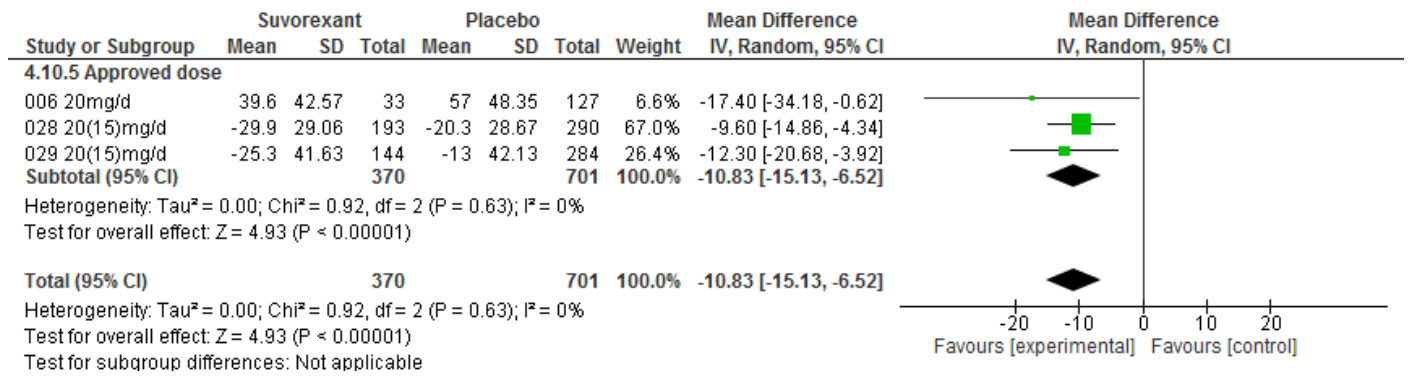

S1-34 Fig. Latency to onset of persistent sleep (minutes) at Month 1

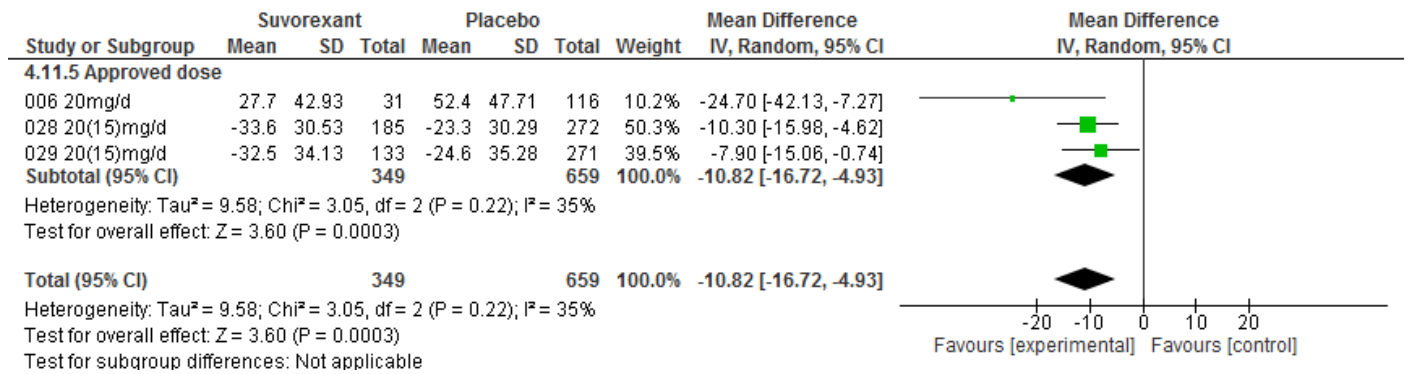

S1-35 Fig. Latency to onset of persistent sleep (minutes) at Month 3

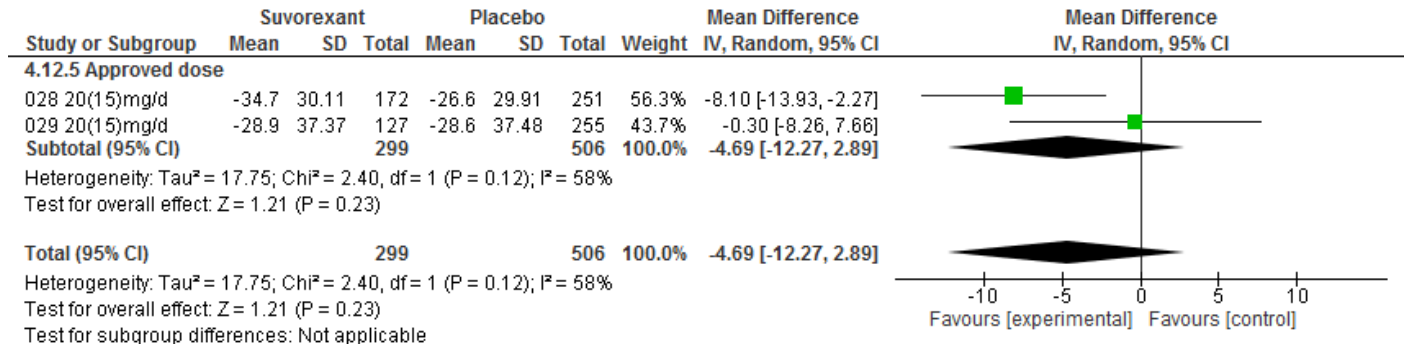

S1-36 Fig. Wakefulness after persistent sleep onset (minutes) at Day 1

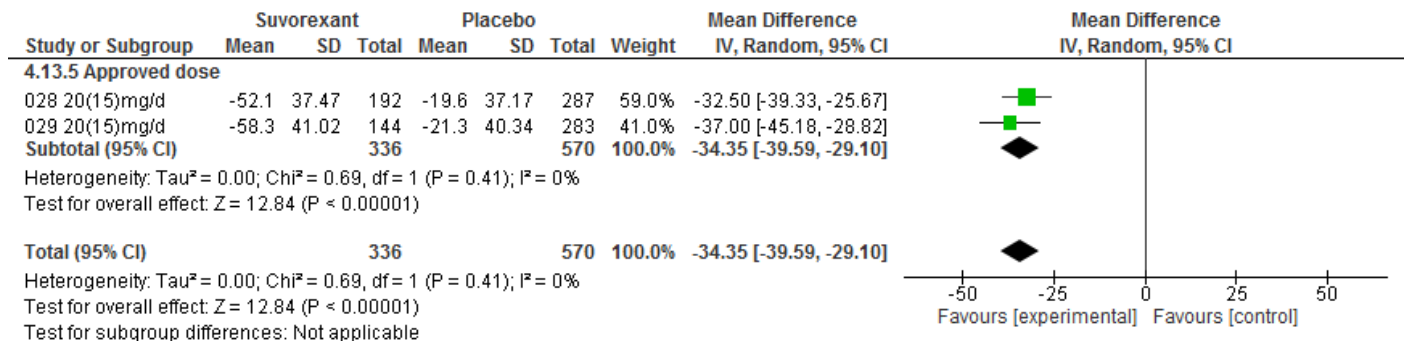

S1-37 Fig. Wakefulness after persistent sleep onset (minutes) at Month 1

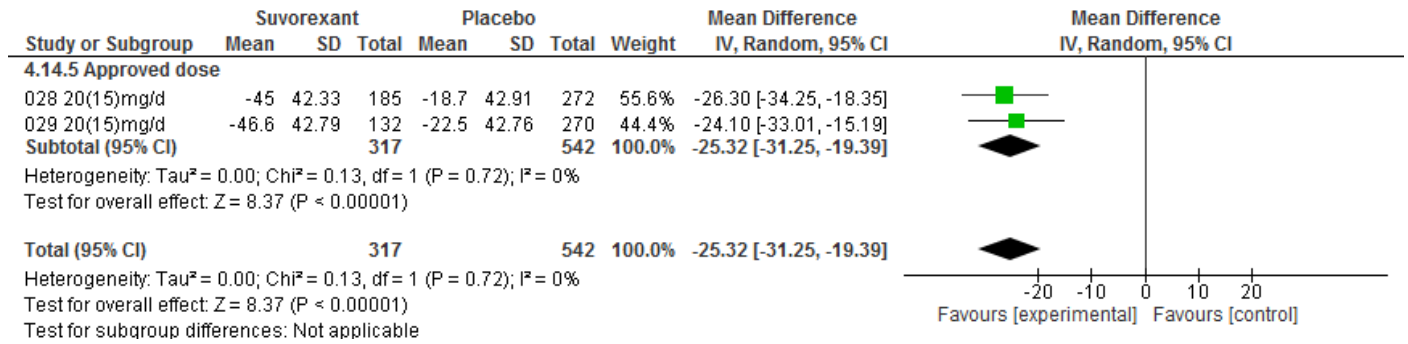

S1-38 Fig. Wakefulness after persistent sleep onset (minutes) at Month 3

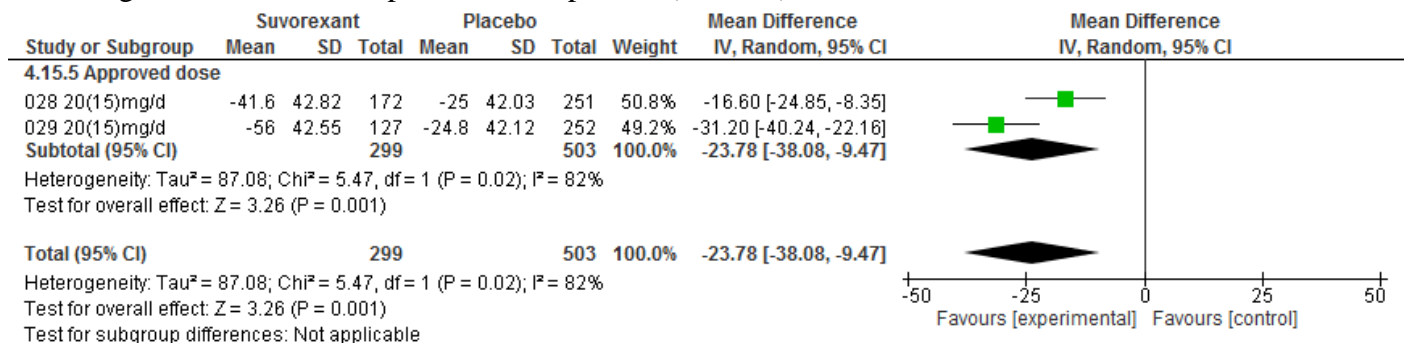

Supplement: pone.0136910.s002.pdf [file pone.0136910.s002.pdf]
