# Supplementary material for: Suvorexant for Primary Insomnia: A Systematic Review and Meta-Analysis of Randomized Placebo-Controlled Trials
Source: PubMed Central journal article supplement (PMC4552781; doi:10.1371/journal.pone.0136910), 2015-08-28

S2 Fig. Forest plots of safety secondary outcomes.

S2-1 Fig. Discontinuation due to all cause

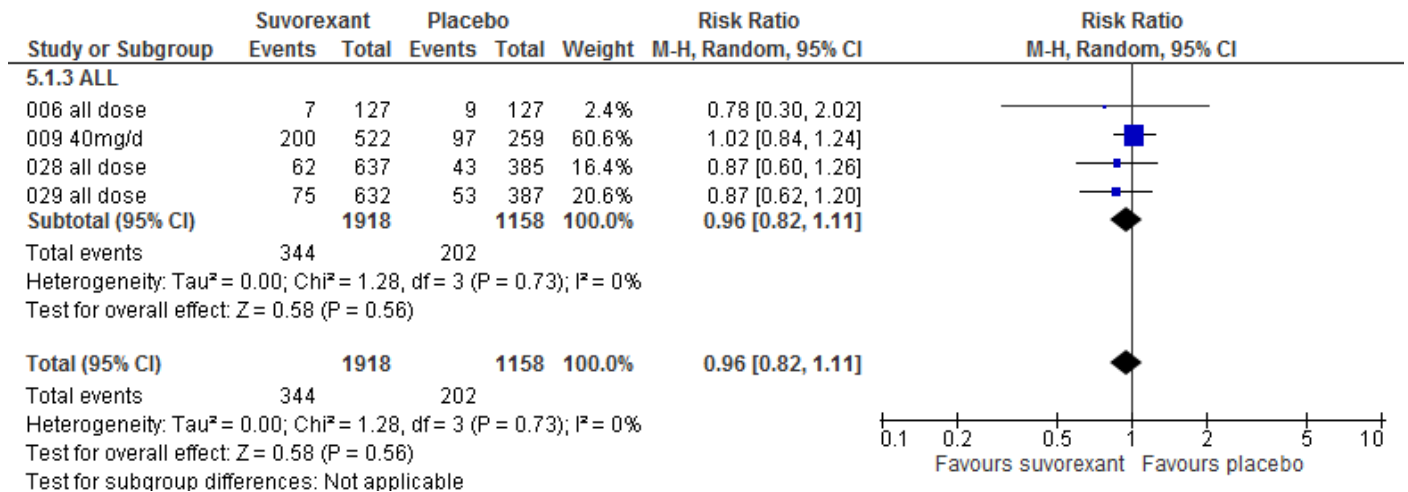

S2-2 Fig. Discontinuation due to intolerability

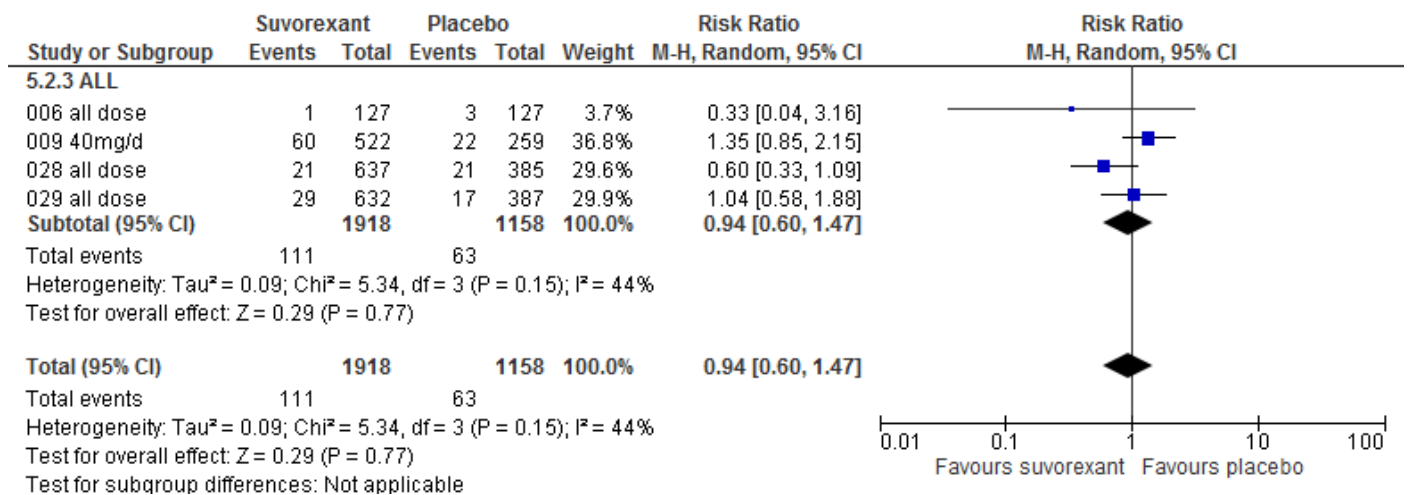

S2-3 Fig. Discontinuation due to inefficacy

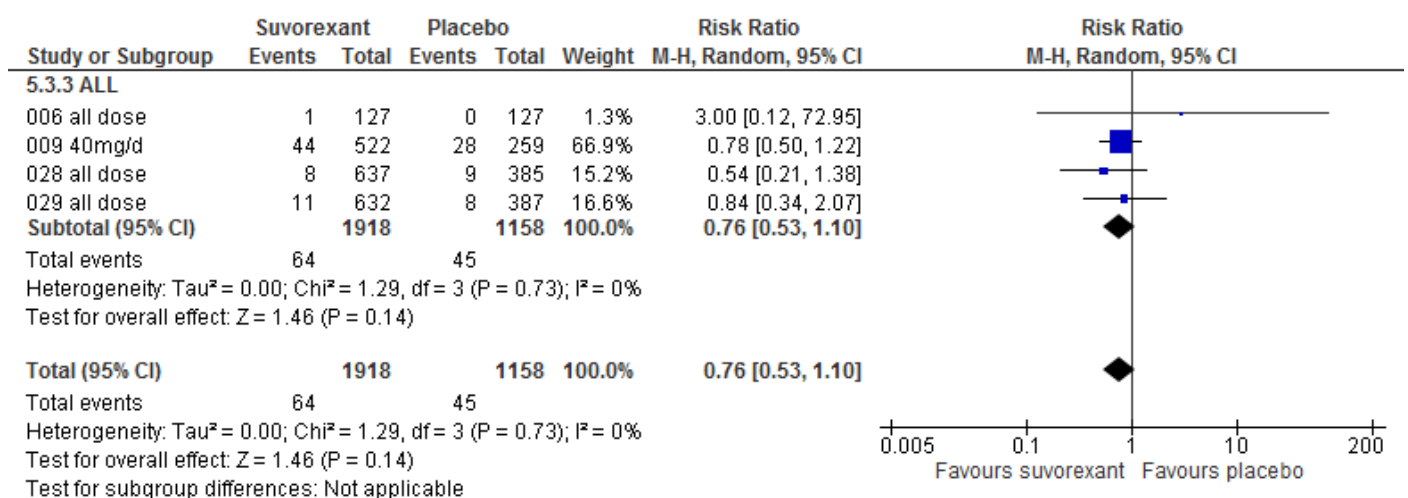

S2-4 Fig. At least one adverse event

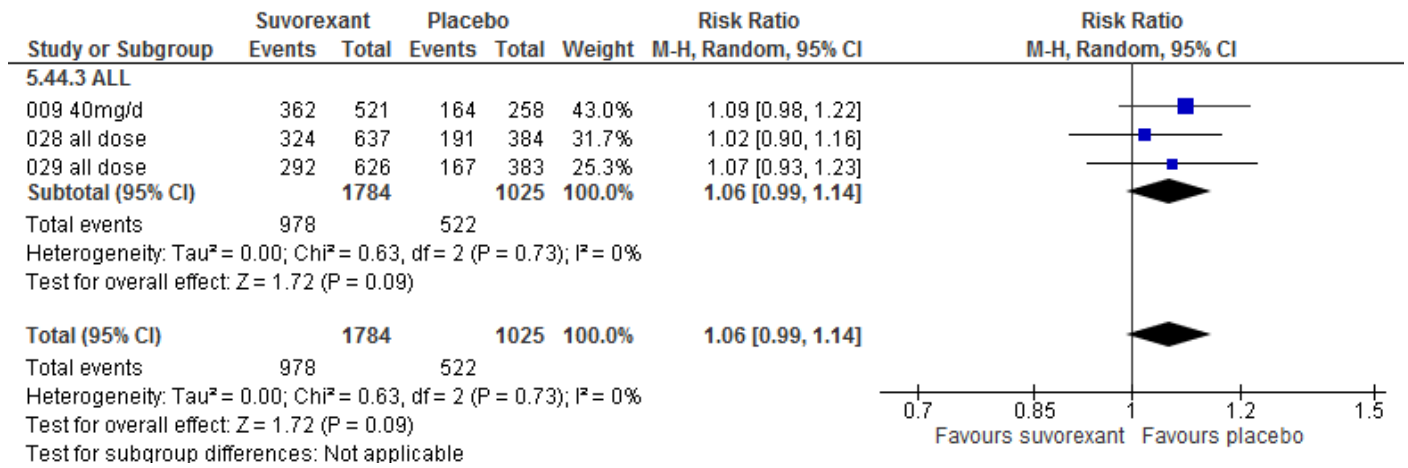

S2-5 Fig. At least one side effect

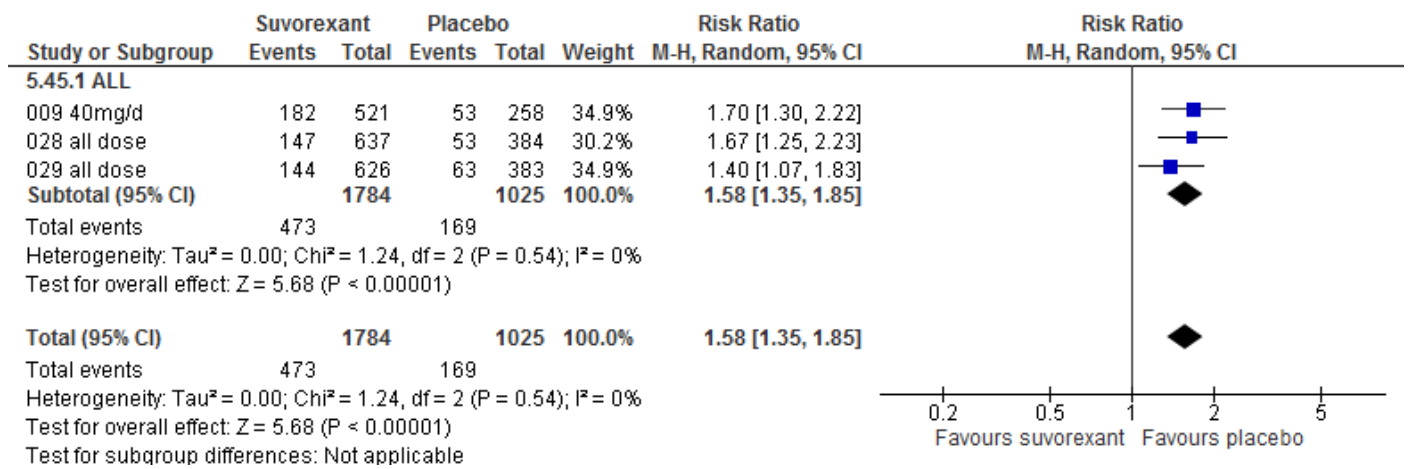

S2-6 Fig. Serious adverse event

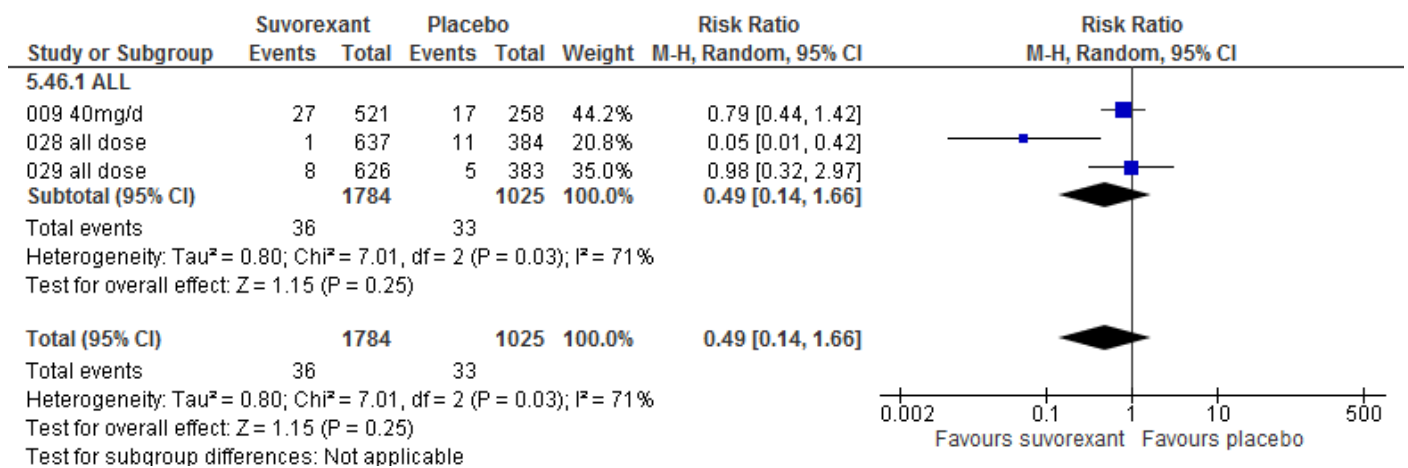

S2-7 Fig. Somnolence

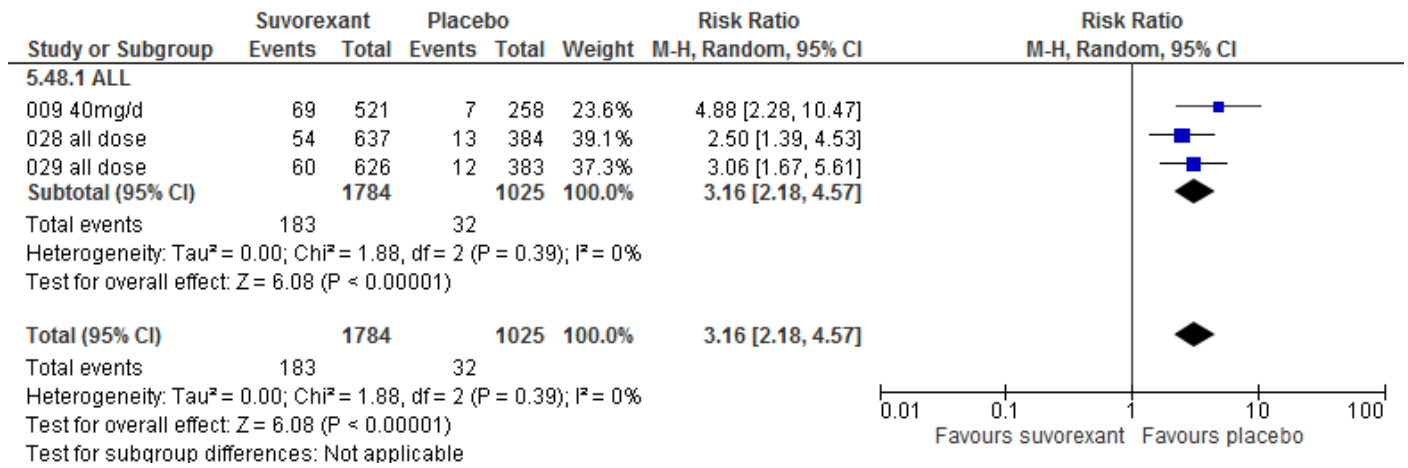

S2-8 Fig. Excessive daytime sleepiness/sedation

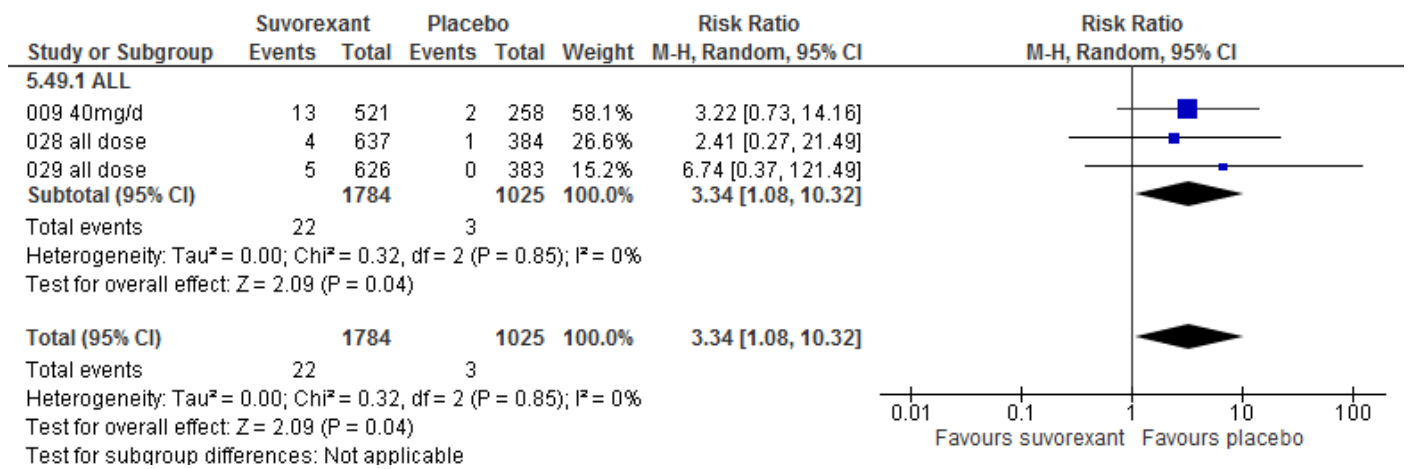

S2-9 Fig. Fatigue

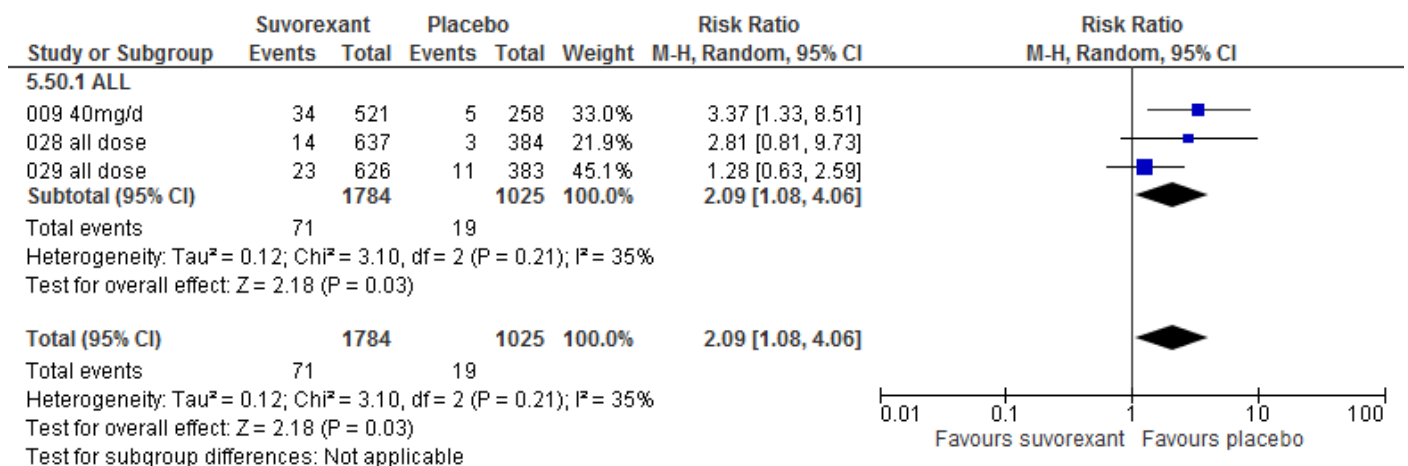

S2-10 Fig. Cataplexy

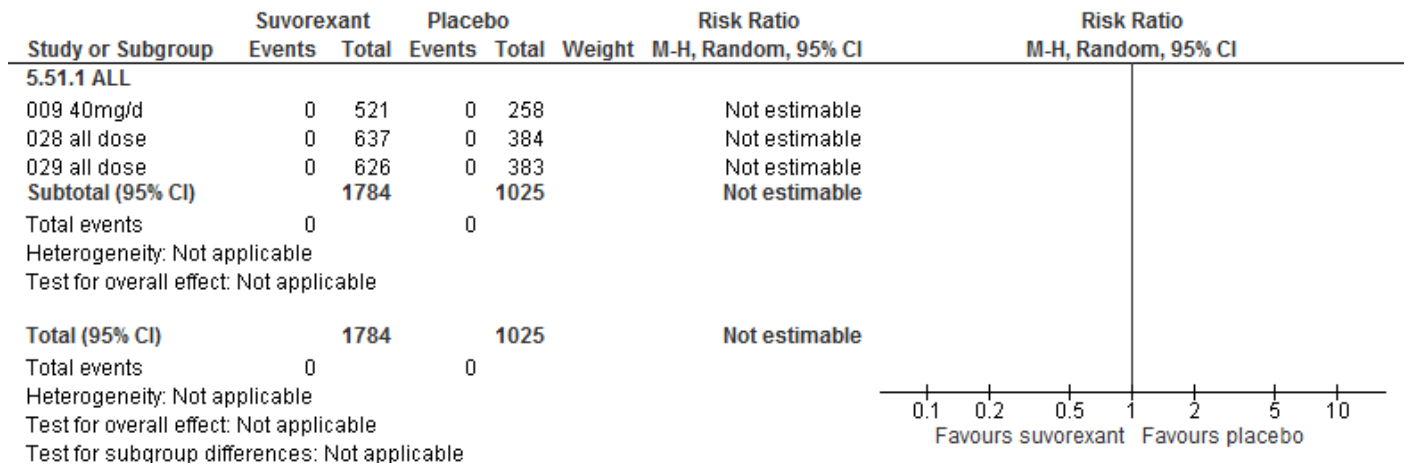

S2-11 Fig. Sleep paralysis

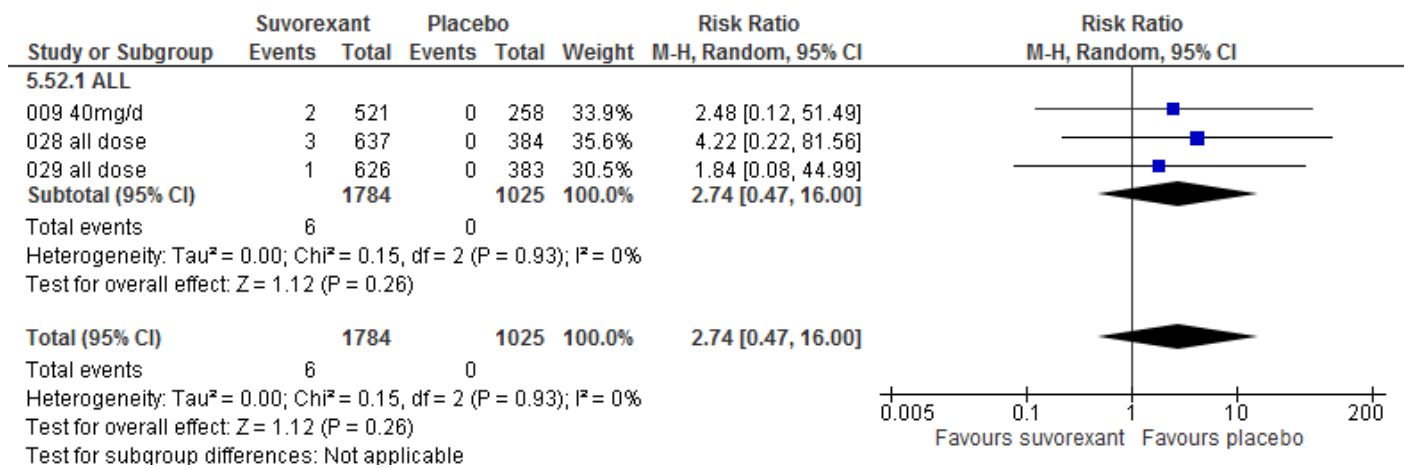

S2-12 Fig. Complex sleep-related behaviours

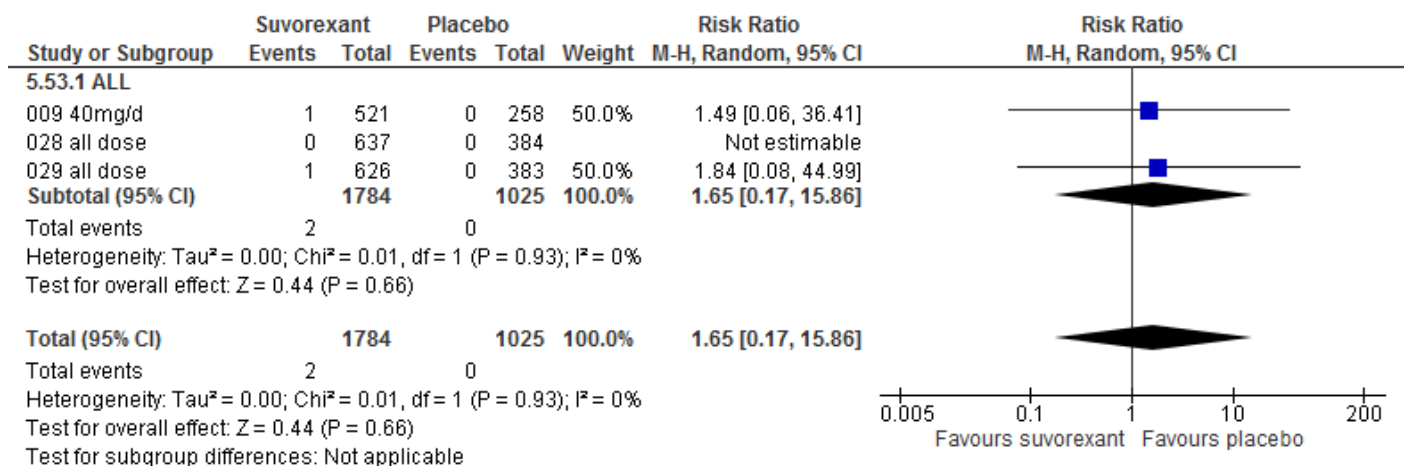

S2-13 Fig. Hypnagogic hallucination

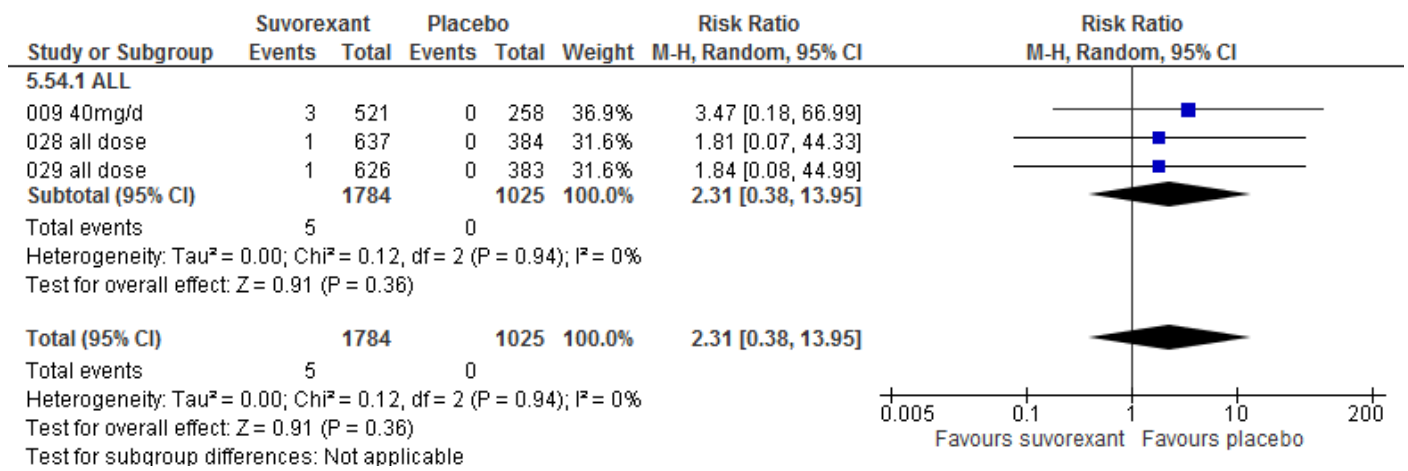

S2-14 Fig. Hypnopompic hallucination

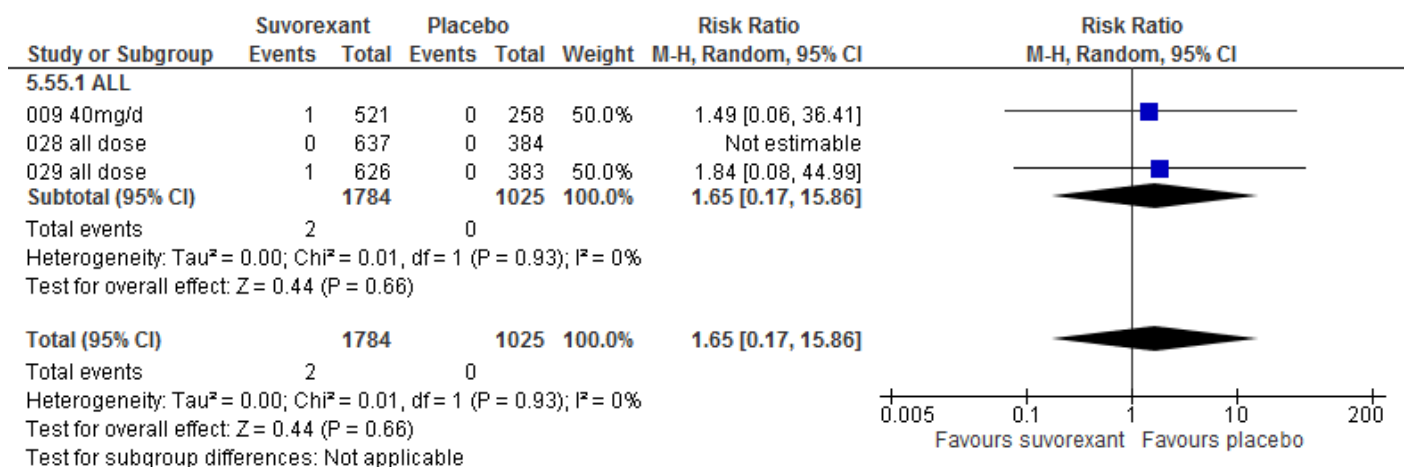

S2-15 Fig. Abnormal dream

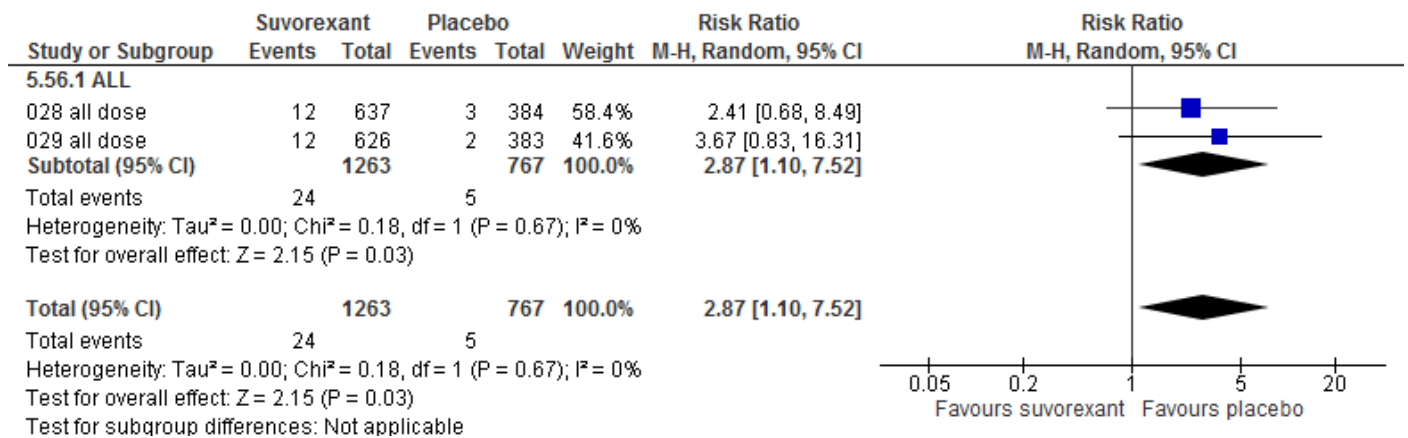

S2-16 Fig. Suicidal ideation

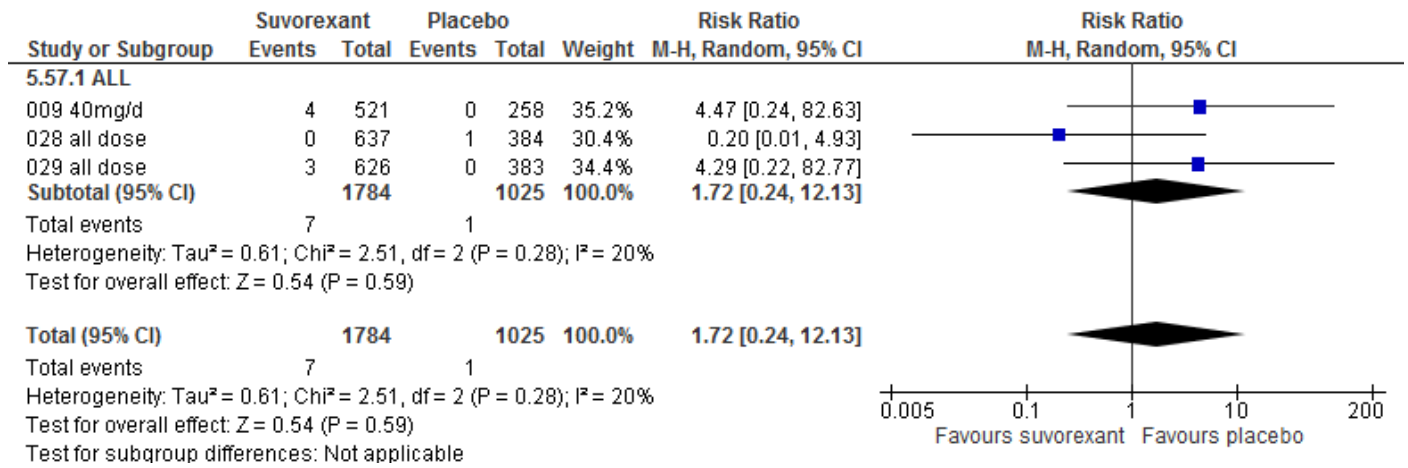

S2-17 Fig. Events suggesting drug-abuse potential

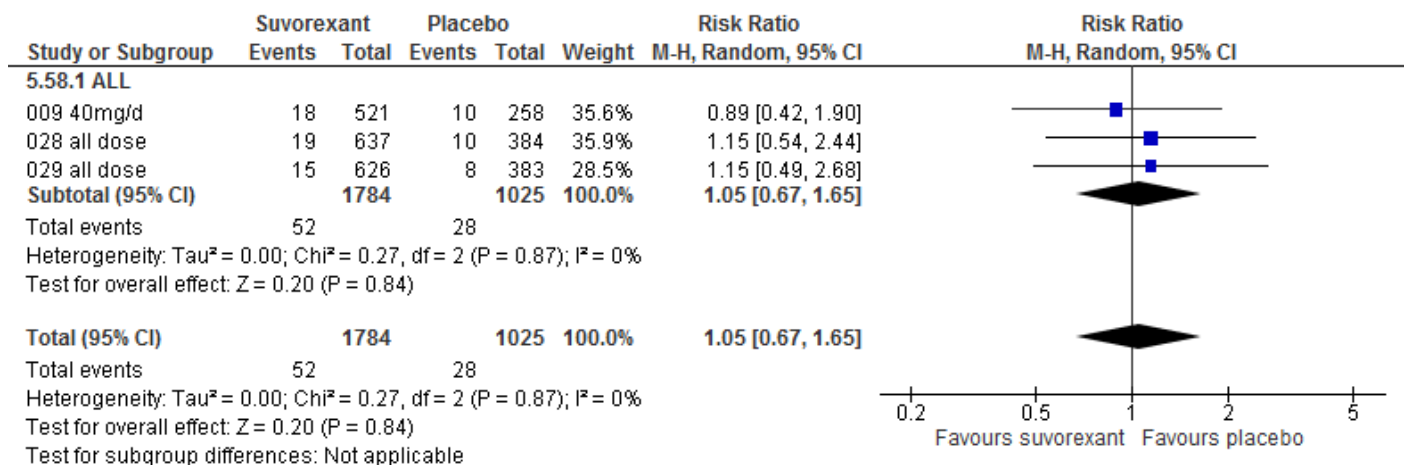

S2-18 Fig. Fall

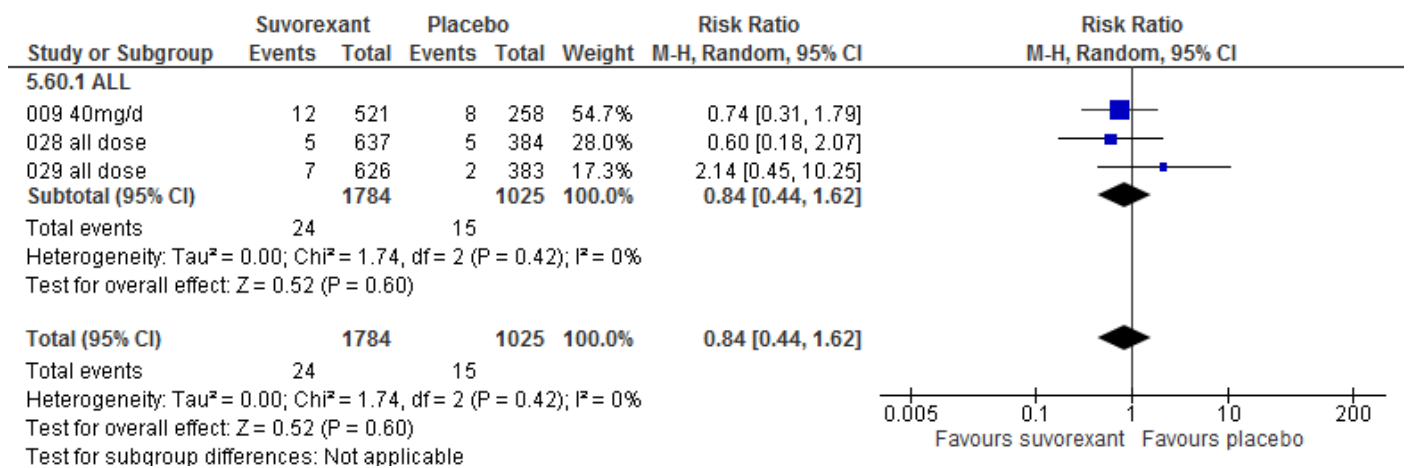

S2-19 Fig. Headache

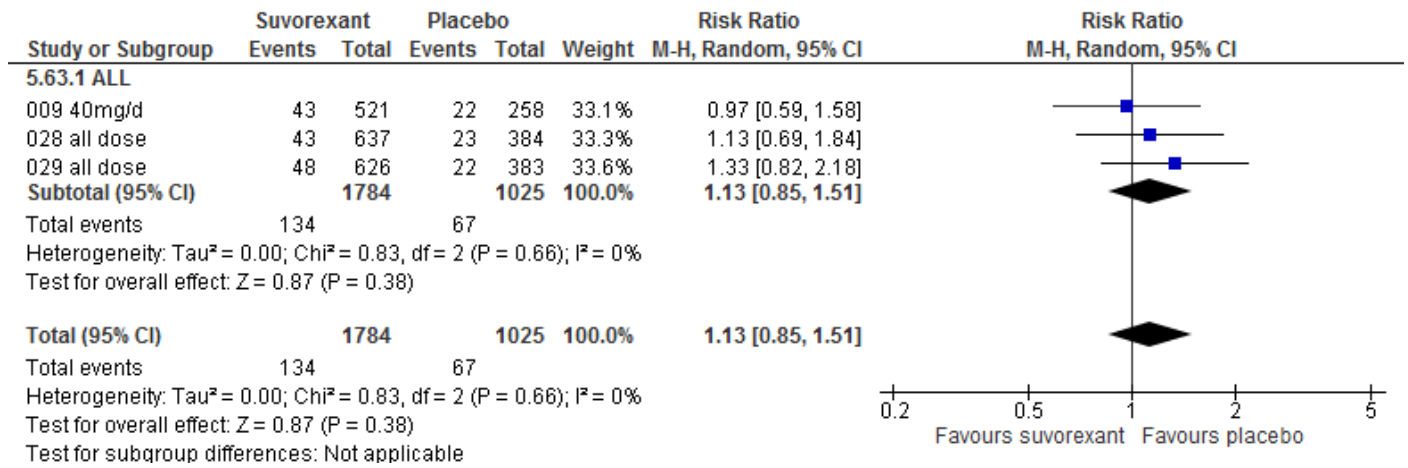

S2-20 Fig. Dizziness

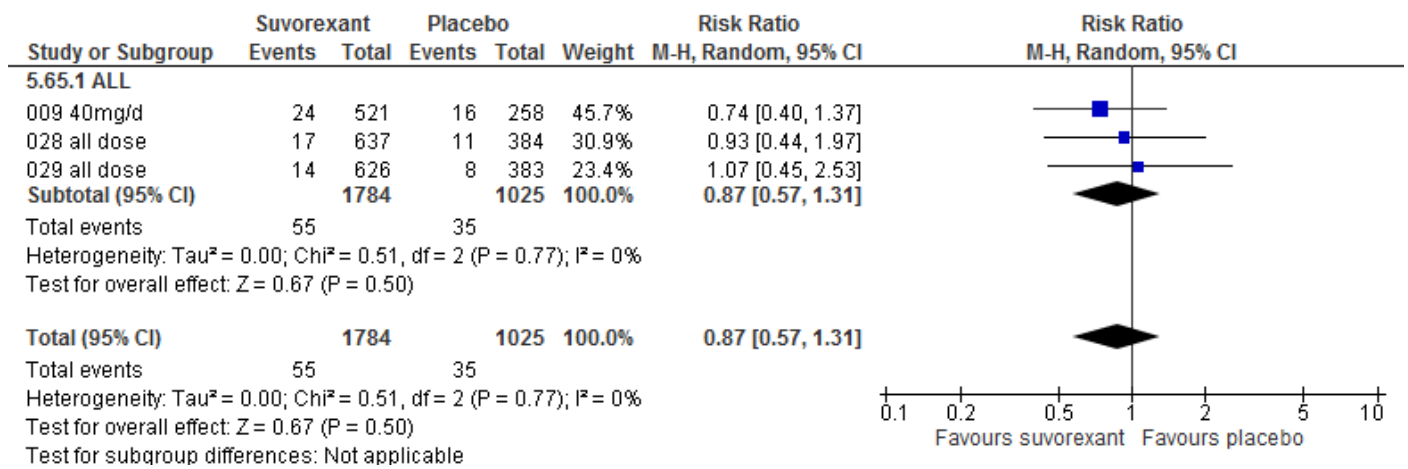

S2-21 Fig. Back pain

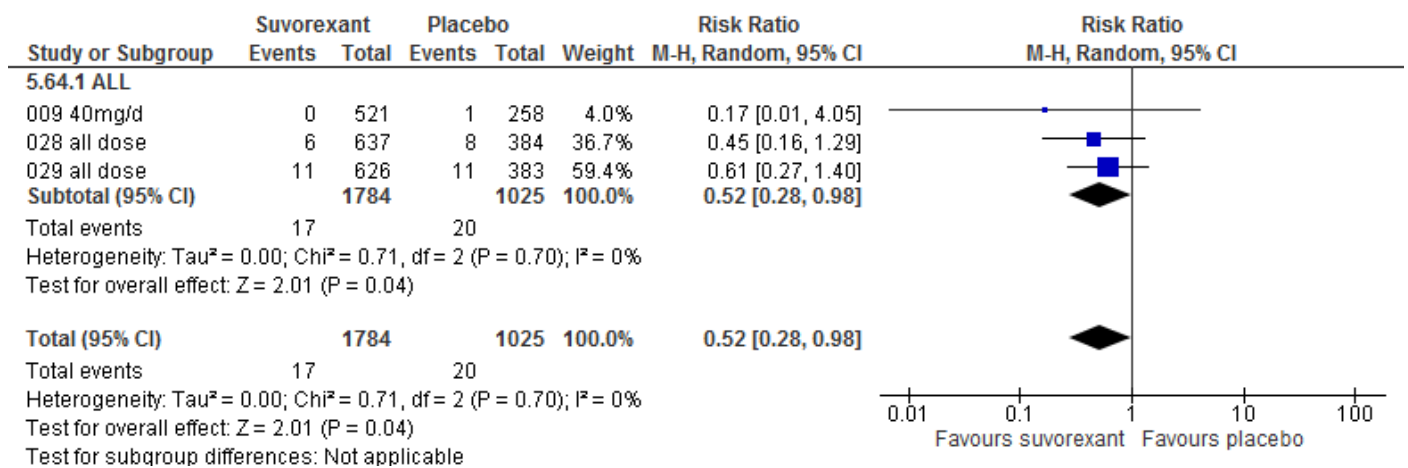

S2-22 Fig. Dry mouth

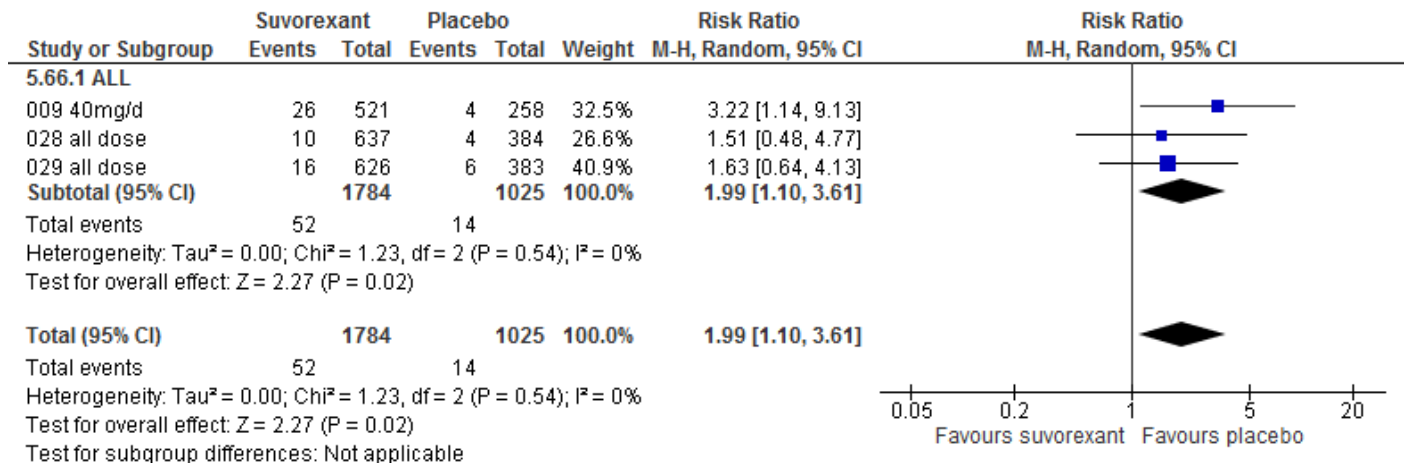

S2-23 Fig. Nasopharyngitis

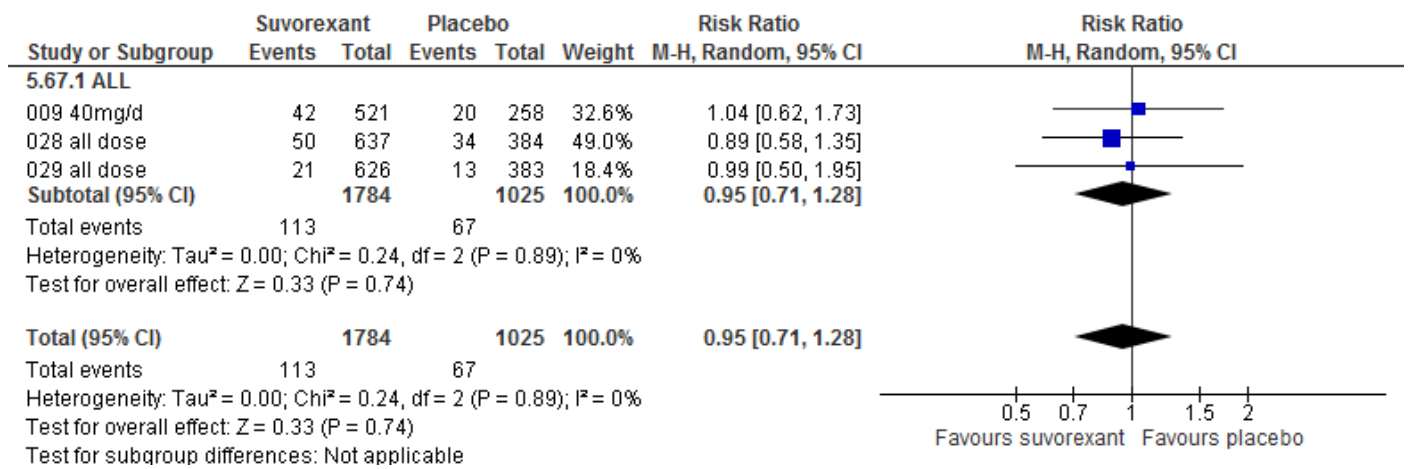

S2-24 Fig. Motor vehicle accidents/violations

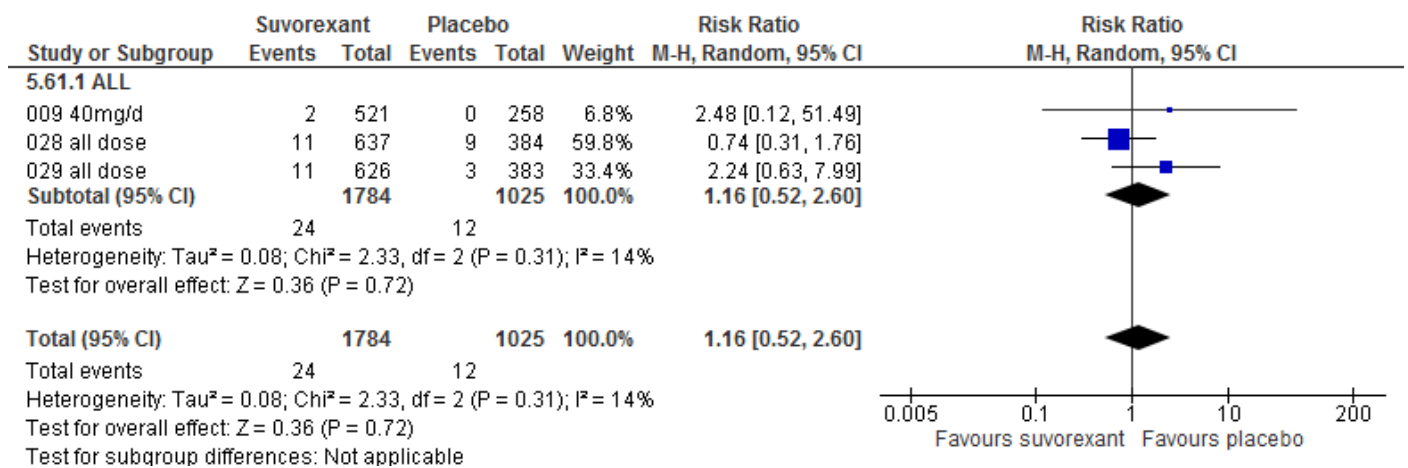

Supplement: pone.0136910.s003.pdf [file pone.0136910.s003.pdf]
