# Supplementary material for: Suvorexant for Primary Insomnia: A Systematic Review and Meta-Analysis of Randomized Placebo-Controlled Trials
Source: PubMed Central journal article supplement (PMC4552781; doi:10.1371/journal.pone.0136910), 2015-08-28

S3 Fig. Forest plots of study run-out phase outcomes.

S3-1 Fig. Discontinuation due to all cause

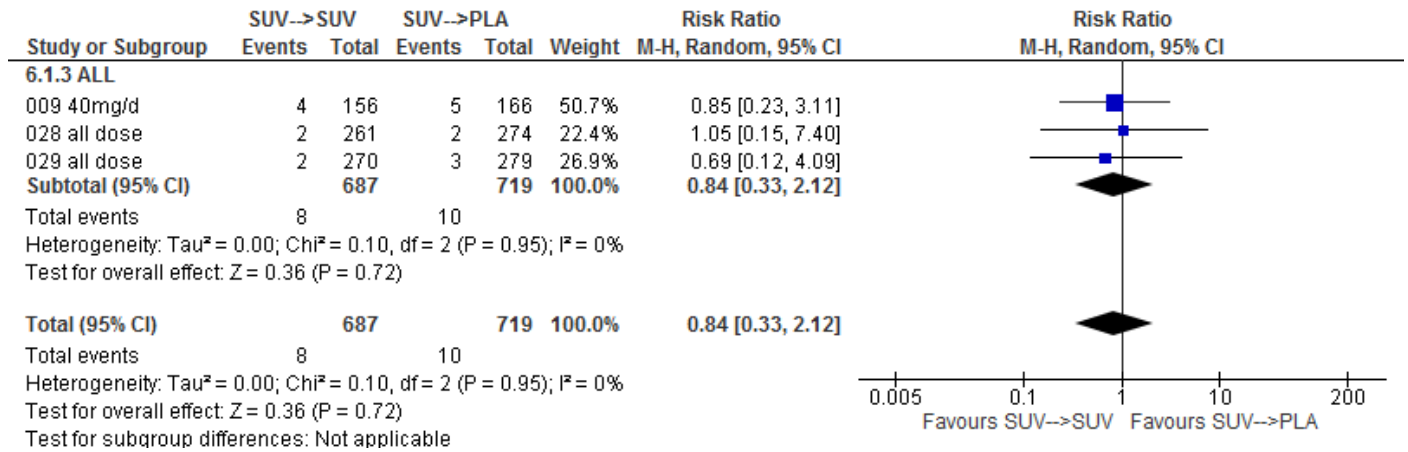

S3-2 Fig. Discontinuation due to intolerability

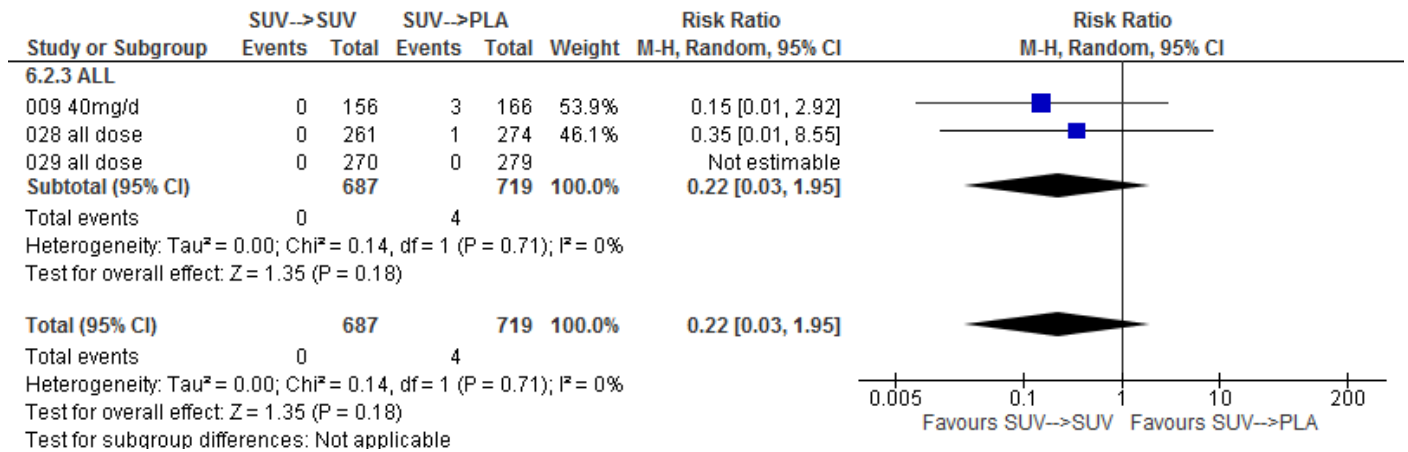

S3-3 Fig. Discontinuation due to inefficacy

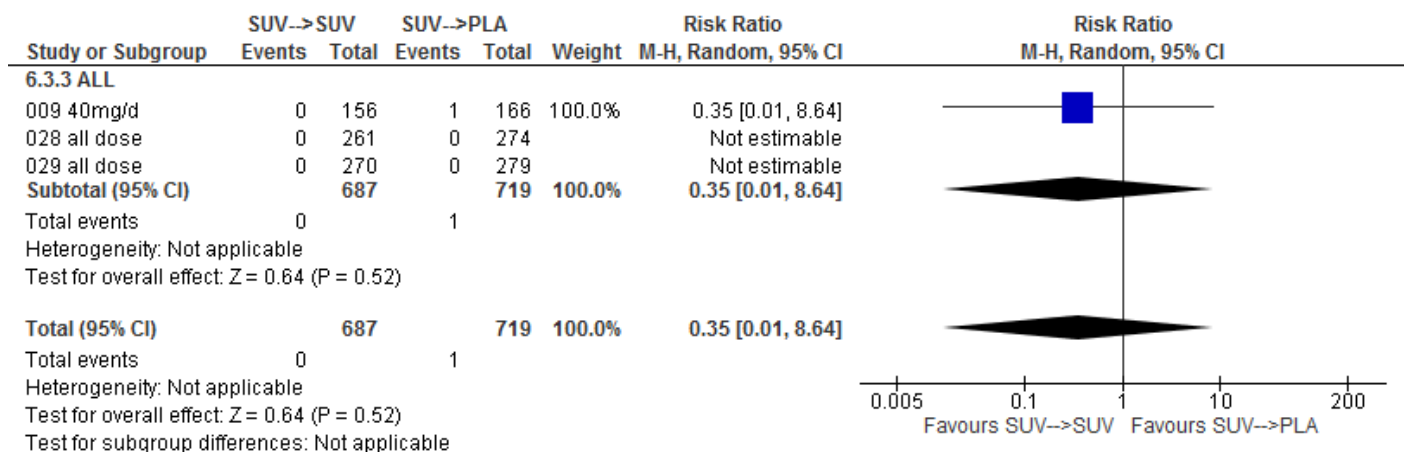

S3-4 Fig. Withdrawal (Tyrer Withdrawal Symptom Questionnaire) at Day 1

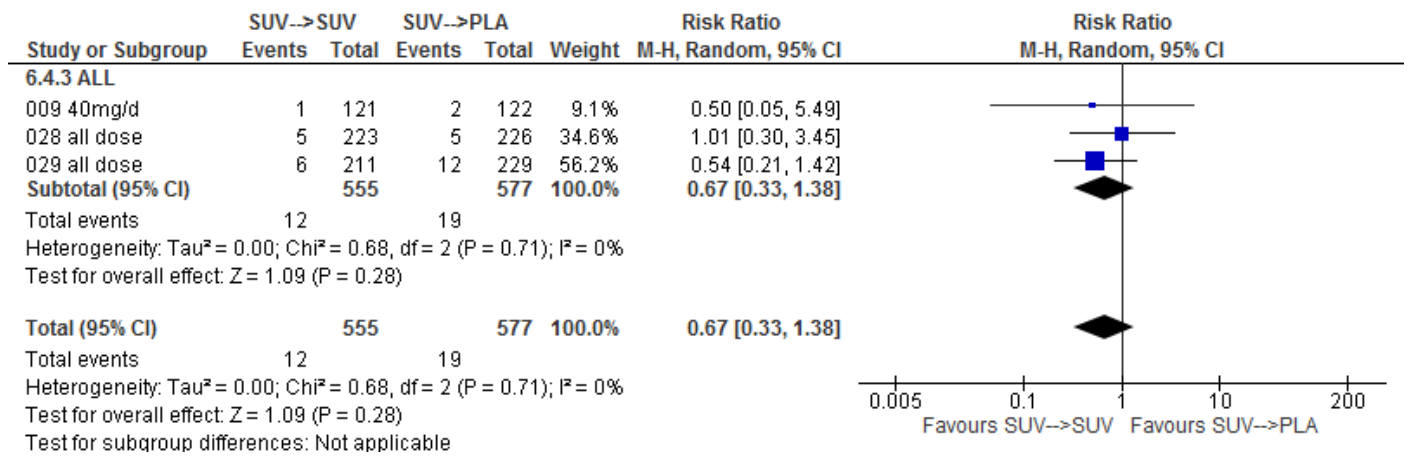

S3-5 Fig. Withdrawal (Tyrer Withdrawal Symptom Questionnaire) at Day 2

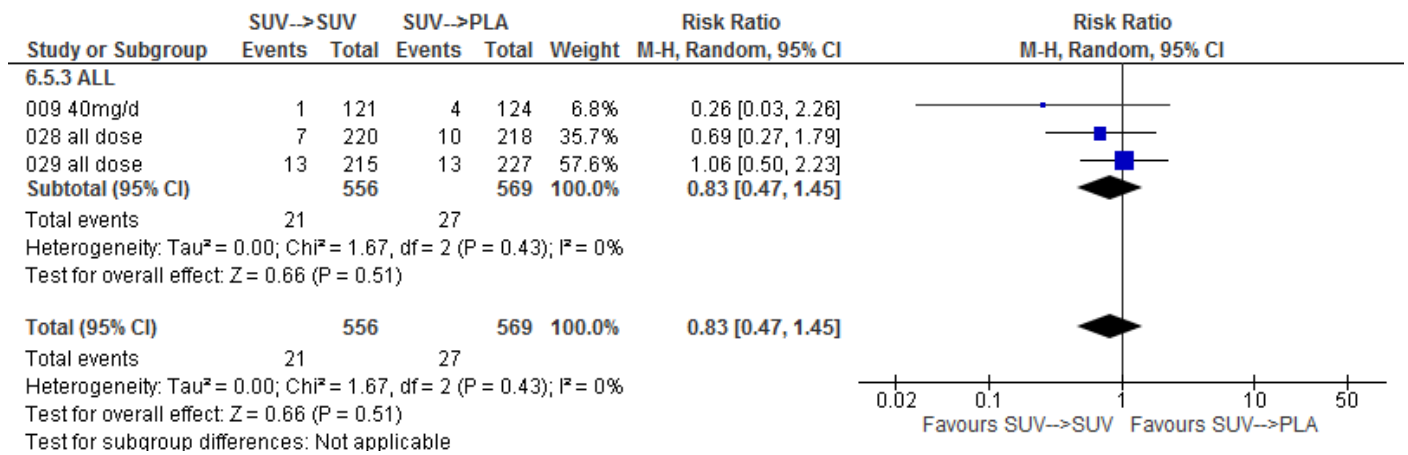

S3-6 Fig. Withdrawal (Tyrer Withdrawal Symptom Questionnaire) at Day 3

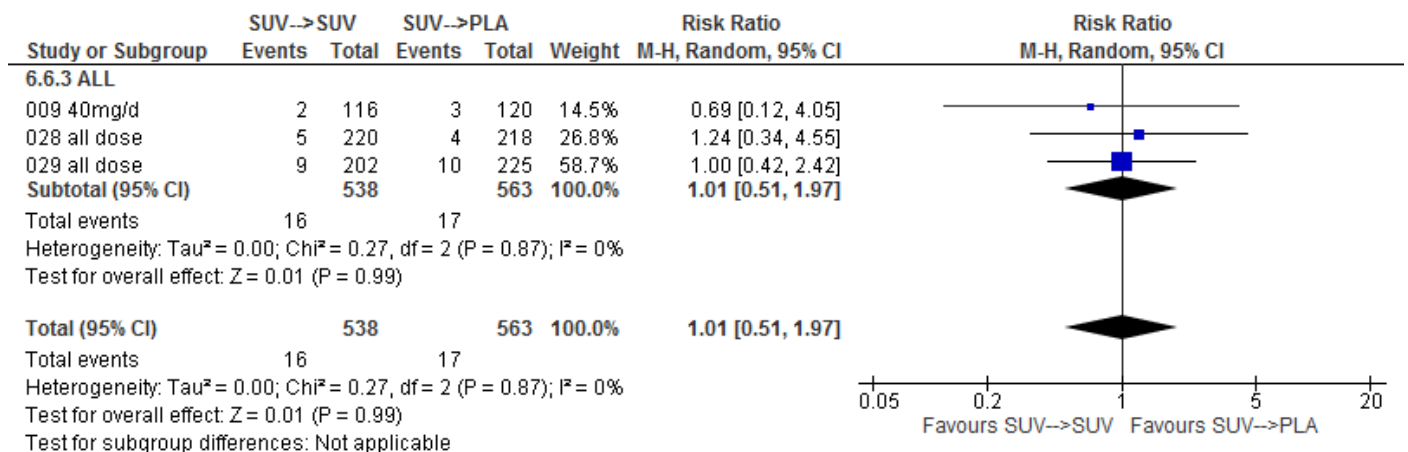

S3-7 Fig. Withdrawal (Tyrer Withdrawal Symptom Questionnaire) at Day 1-3

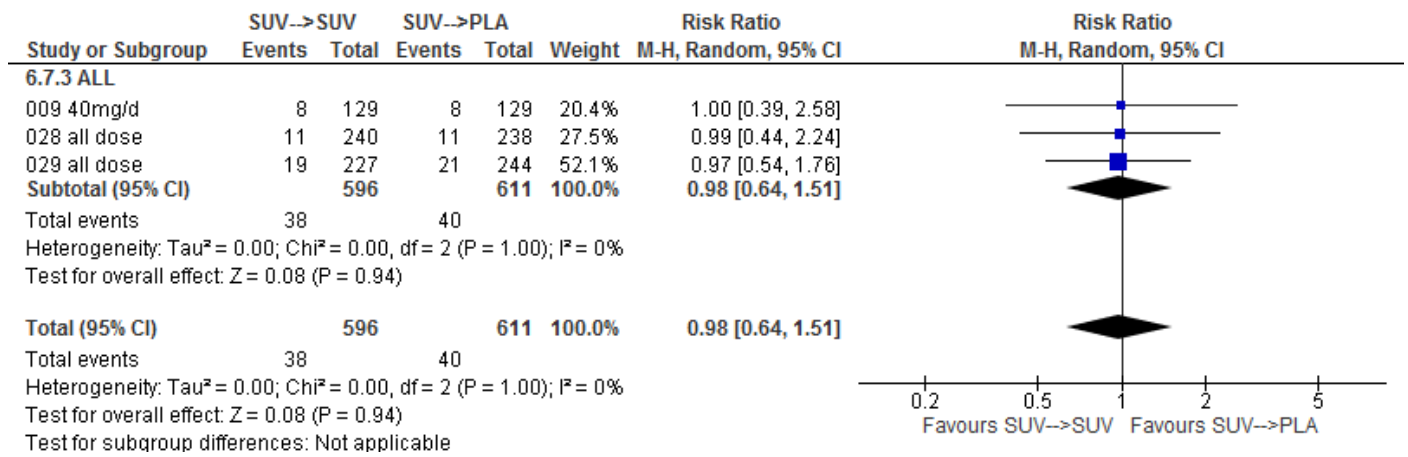

S3-8 Fig. Rebound insomnia (subjective total sleep time) at Day 1

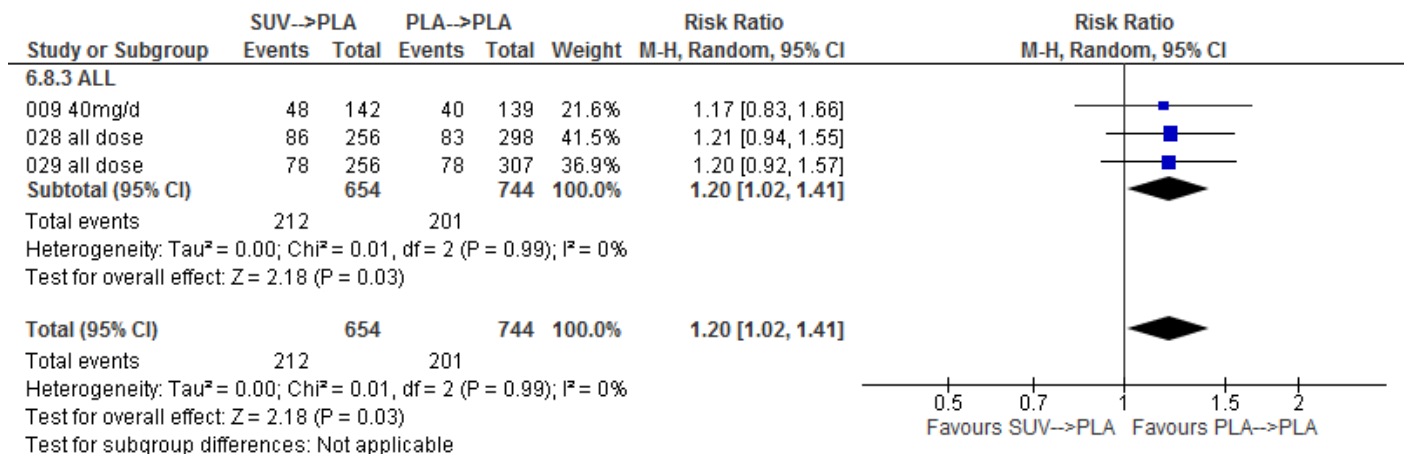

S3-9 Fig. Rebound insomnia (subjective total sleep time) at Day 2

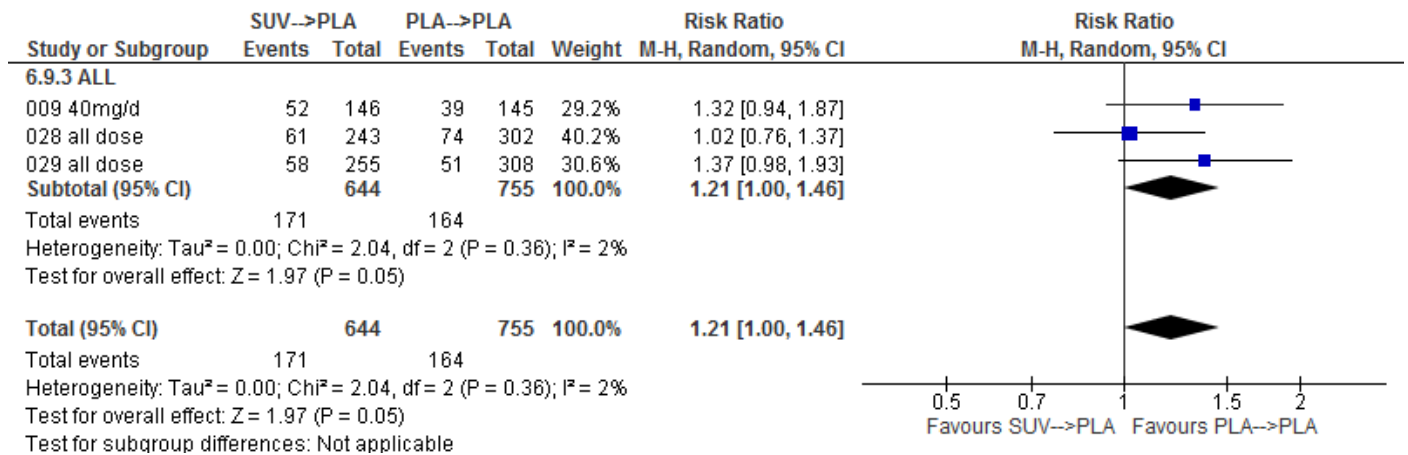

S3-10 Fig. Rebound insomnia (subjective total sleep time) at Day 3

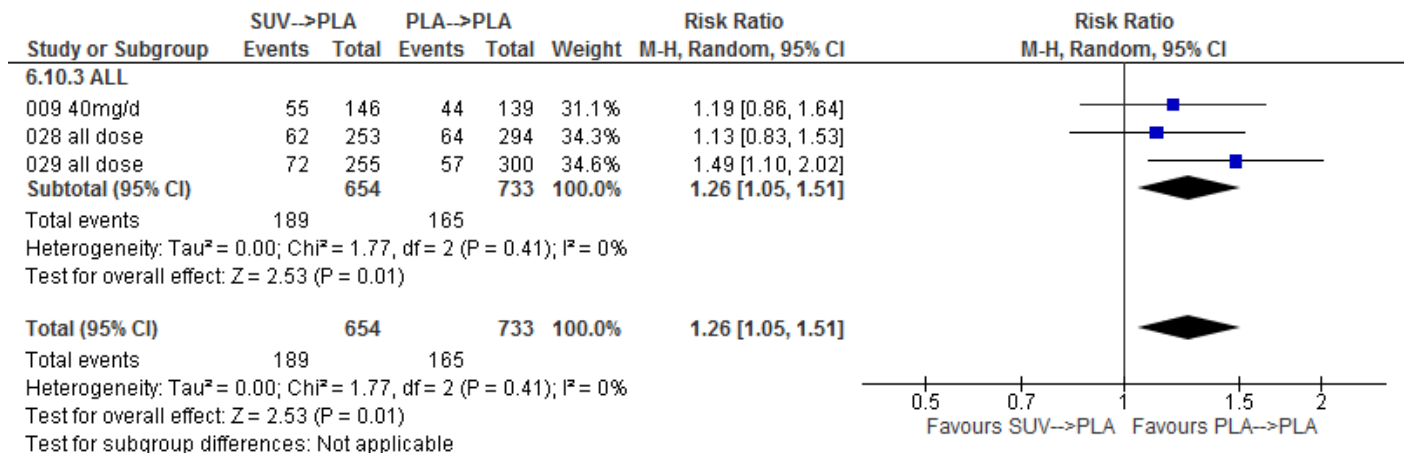

S3-11 Fig. Rebound insomnia (subjective total sleep time) at Day 1-3

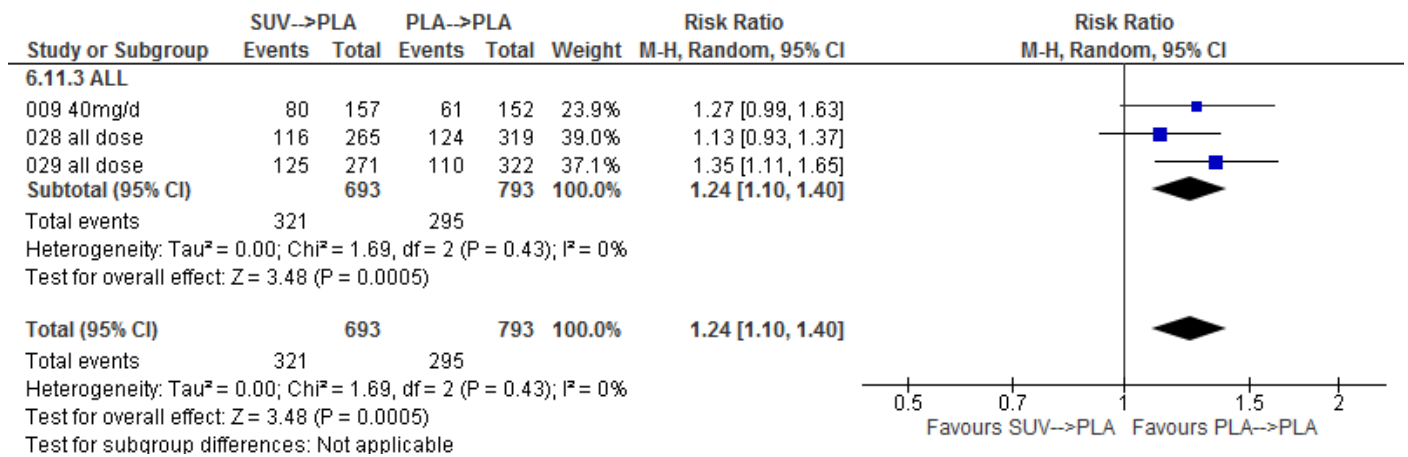

S3-12 Fig. Rebound insomnia (subjective time to sleep onset) at Day 1

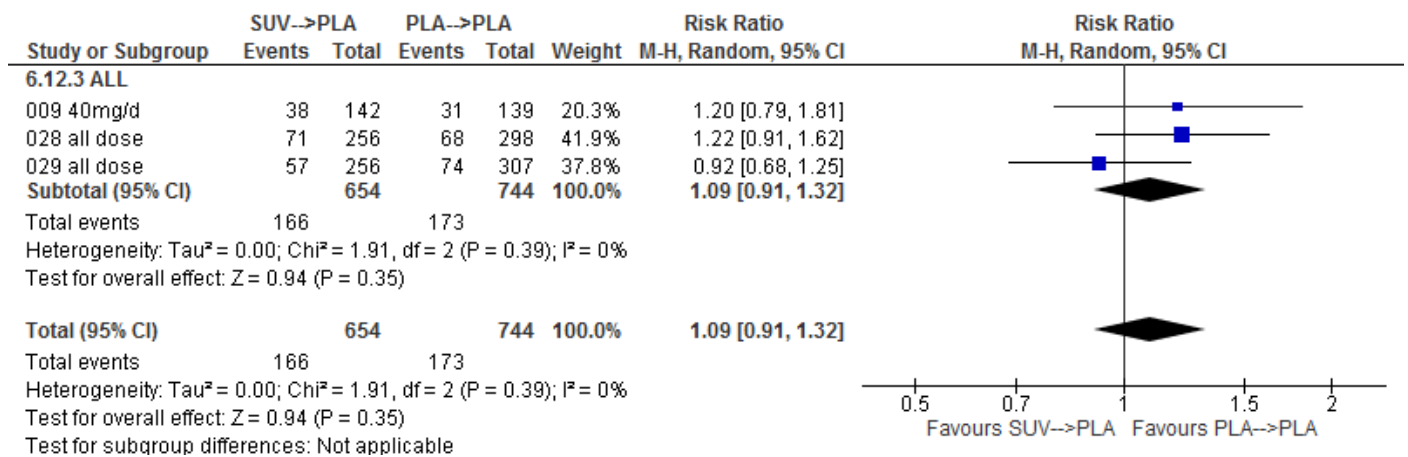

S3-13 Fig. Rebound insomnia (subjective time to sleep onset) at Day 2

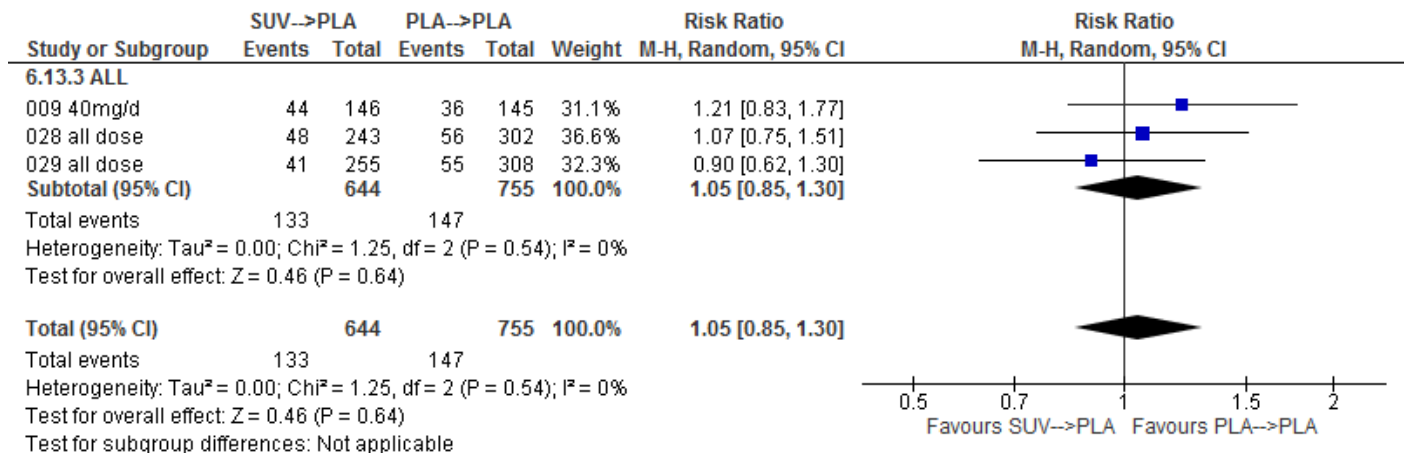

S3-14 Fig. Rebound insomnia (subjective time to sleep onset) at Day 3

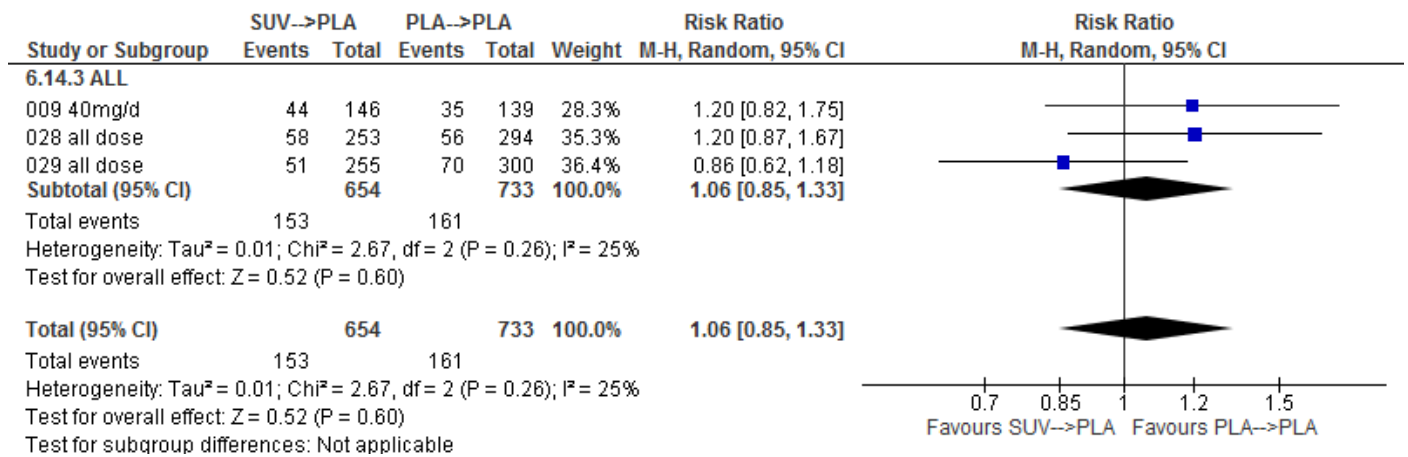

S3-15 Fig. Rebound insomnia (subjective time to sleep onset) at Day 1-3

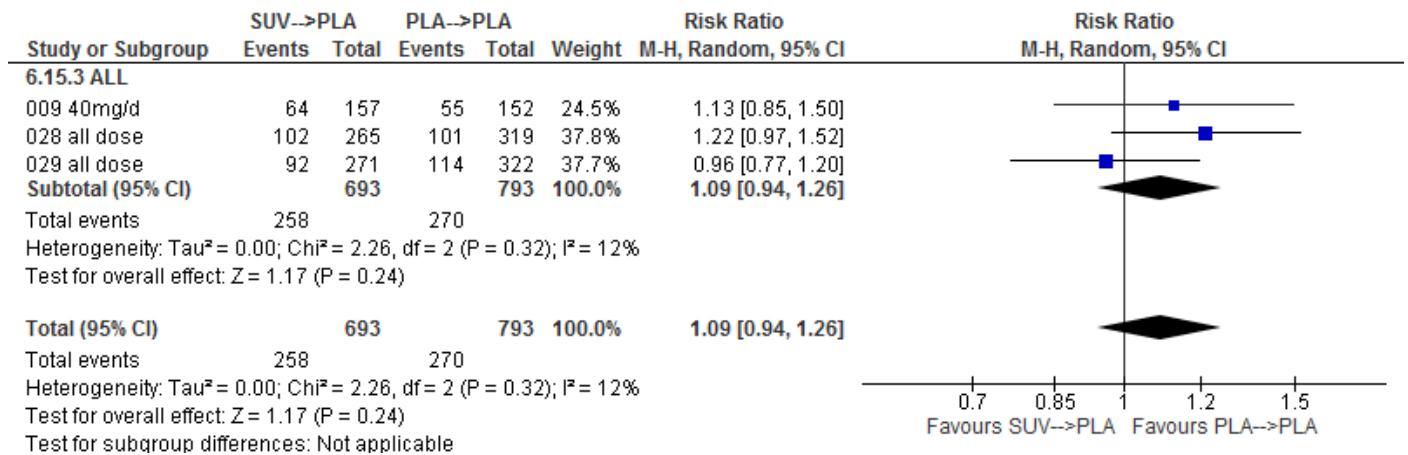

Supplement: pone.0136910.s004.pdf [file pone.0136910.s004.pdf]
