# Supplementary material for: Suvorexant for Primary Insomnia: A Systematic Review and Meta-Analysis of Randomized Placebo-Controlled Trials
Source: PubMed Central journal article supplement (PMC4552781; doi:10.1371/journal.pone.0136910), 2015-08-28
Supplement: pone.0136910.s005.pdf [file pone.0136910.s005.pdf]

|                                                 | 006 study                       | 009 study             | 028 study                    | 029 study                    |
|-------------------------------------------------|---------------------------------|-----------------------|------------------------------|------------------------------|
| Subjective total sleep time, Week 1             |                                 | diary (change scores) | diary (change scores)        | diary (change scores)        |
| Subjective total sleep time, Month 1*           |                                 | diary (change scores) | diary (change scores)        | diary (change scores)        |
| Subjective total sleep time, Month 3            |                                 |                       | diary (change scores)        | diary (change scores)        |
| Subjective time-to-sleep onset, Week 1          |                                 | diary (change scores) | diary (change scores)        | diary (change scores)        |
| Subjective time-to-sleep onset, Month 1*        |                                 | diary (change scores) | diary (change scores)        | diary (change scores)        |
| Subjective time-to-sleep onset, Month 3         |                                 |                       | diary (change scores)        | diary (change scores)        |
| Subjective wake after sleep onset, Week 1       |                                 |                       | diary (change scores)        | diary (change scores)        |
| Subjective wake after sleep onset, Month 1      |                                 | diary (change scores) | diary (change scores)        | diary (change scores)        |
| Subjective wake after sleep onset, Month 3      |                                 |                       | diary (change scores)        | diary (change scores)        |
| Latency to persistent sleep, Day 1              | PSG (endpoint scores, period 1) |                       | PSG (change scores)          | PSG (change scores)          |
| Latency to persistent sleep, Month 1            | PSG (endpoint scores, period 1) |                       | PSG (change scores)          | PSG (change scores)          |
| Latency to persistent sleep, Month 3            |                                 |                       | PSG (change scores)          | PSG (change scores)          |
| Wake after sleep onset, Day 1                   |                                 |                       | PSG (change scores)          | PSG (change scores)          |
| Wake after sleep onset, Month 1                 |                                 |                       | PSG (change scores)          | PSG (change scores)          |
| Wake after sleep onset, Month 3                 |                                 |                       | PSG (change scores)          | PSG (change scores)          |
| Subjective quality of sleep, Week 1             |                                 |                       | diary (change scores)        | diary (change scores)        |
| Subjective quality of sleep, Month 1            |                                 | diary (change scores) | diary (change scores)        | diary (change scores)        |
| Subjective quality of sleep, Month 3            |                                 |                       | diary (change scores)        | diary (change scores)        |
| Subjective refreshed feeling on waking, Month 1 |                                 | diary (change scores) | diary (change scores)        | diary (change scores)        |
| Subjective refreshed feeling on waking, Month 3 |                                 |                       | diary (change scores)        | diary (change scores)        |
| Subjective number of awakenings, Week 1         |                                 |                       | diary (change scores)        | diary (change scores)        |
| Subjective number of awakenings, Month 1        |                                 | diary (change scores) | diary (change scores)        | diary (change scores)        |
| Subjective number of awakenings, Month 3        |                                 |                       | diary (change scores)        | diary (change scores)        |
| Insomnia Severity Index, Month 1                |                                 |                       | rating scale (change scores) | rating scale (change scores) |
| Insomnia Severity Index, Month 3                |                                 |                       | rating scale (change scores) | rating scale (change scores) |

|                                                     | 006 study | 009 study                    | 028 study                    | 029 study                    |
|-----------------------------------------------------|-----------|------------------------------|------------------------------|------------------------------|
| Clinician global impression of severity, Week 2     |           |                              | rating scale (change scores) | rating scale (change scores) |
| Clinician global impression of severity, Month 1    |           | rating scale (change scores) | rating scale (change scores) | rating scale (change scores) |
| Clinician global impression of severity, Month 3    |           |                              | rating scale (change scores) | rating scale (change scores) |
| Patient global impression of severity, Week 2       |           |                              | rating scale (change scores) | rating scale (change scores) |
| Patient global impression of severity, Month 1      |           | rating scale (change scores) | rating scale (change scores) | rating scale (change scores) |
| Patient global impression of severity, Month 3      |           |                              | rating scale (change scores) | rating scale (change scores) |
| Clinician global impression of improvement, Week 2  |           |                              | rating scale (change scores) | rating scale (change scores) |
| Clinician global impression of improvement, Month 1 |           | rating scale (change scores) | rating scale (change scores) | rating scale (change scores) |
| Clinician global impression of improvement, Month 3 |           |                              | rating scale (change scores) | rating scale (change scores) |
| Patient global impression of improvement, Week 2    |           |                              | rating scale (change scores) | rating scale (change scores) |
| Patient global impression of improvement, Month 1   |           | rating scale (change scores) | rating scale (change scores) | rating scale (change scores) |
| Patient global impression of improvement, Month 3   |           |                              | rating scale (change scores) | rating scale (change scores) |

**S1 Table. Data synthesis.**

PSG: polysomnography

\* The primary outcomes for measuring efficacy were either subjective total sleep time or subjective time-to-sleep onset at 1 month.
