# Supplementary material for: Suvorexant for Primary Insomnia: A Systematic Review and Meta-Analysis of Randomized Placebo-Controlled Trials
Source: PubMed Central journal article supplement (PMC4552781; doi:10.1371/journal.pone.0136910), 2015-08-28
Supplement: pone.0136910.s006.pdf [file pone.0136910.s006.pdf]

| Study                                                                                      | Total n | Patients                                                                                                                                                                                                                             | Duration | Age (mean+/-SD)                                                                                                                                                    | Male, %                                                                   | White (%)                                                                | Drug       | n                | Outcomes <sup>a</sup>                                                                                                                                                                        |
|--------------------------------------------------------------------------------------------|---------|--------------------------------------------------------------------------------------------------------------------------------------------------------------------------------------------------------------------------------------|----------|--------------------------------------------------------------------------------------------------------------------------------------------------------------------|---------------------------------------------------------------------------|--------------------------------------------------------------------------|------------|------------------|----------------------------------------------------------------------------------------------------------------------------------------------------------------------------------------------|
| 006 (2012).<br>USA and Japan.<br>Industry.<br>NCT00792298                                  | 254     | Primary insomnia (DSM-IV-TR). age: 18 to 64 years. 1-week, SB, PLA run-in period (PSG assessments: the first night and 1 week later. LPS>20 mins. on both PSG nights and mean WASO≥60 mins on both nights with neither night<45 min) | 4 weeks  | SUV10: 45.1+/-11.5,<br>SUV20: 44.3+/-11.1,<br>SUV40: 44.5+/-11.3,<br>SUV80: 43.8+/-12.1,<br>PLA: 44.3+/-11.5                                                       | SUV10: 45.2,<br>SUV20: 34.4,<br>SUV40: 45.8,<br>SUV80: 44.3,<br>PLA: 41.0 | SUV10: 71.0<br>SUV20: 63.9,<br>SUV40: 71.2,<br>SUV80: 73.8,<br>PLA: 70.3 | SUV10 mg/d | 63<br>(31/32)    | all dose>PLA: <u>SE</u> ,<br>WASO and TST, only<br>SUV20, 40 and<br>80>PLA: ISI, only<br>SUV40 and 80>PLA:<br>sTST, sTSO, sQUAL,<br>only SUV20>PLA:<br>LPS, all dose=PLA:<br>NAW and sFRESH  |
|                                                                                            |         |                                                                                                                                                                                                                                      |          |                                                                                                                                                                    |                                                                           |                                                                          | SUV20 mg/d | 65<br>(33/32)    |                                                                                                                                                                                              |
|                                                                                            |         |                                                                                                                                                                                                                                      |          |                                                                                                                                                                    |                                                                           |                                                                          | SUV40 mg/d | 64<br>(32/32/)   |                                                                                                                                                                                              |
|                                                                                            |         |                                                                                                                                                                                                                                      |          |                                                                                                                                                                    |                                                                           |                                                                          | SUV80 mg/d | 62<br>(31/31)    |                                                                                                                                                                                              |
|                                                                                            |         |                                                                                                                                                                                                                                      |          |                                                                                                                                                                    |                                                                           |                                                                          | PLA        | 253<br>(127/126) |                                                                                                                                                                                              |
| 009 (2014).<br>USA, Australia,<br>Europe, and<br>South Africa.<br>Industry.<br>NCT01021813 | 781     | Primary insomnia (DSM-IV-TR, assessed by a clinical interview and a structured sleep diagnostic interview). age≥18 years.                                                                                                            | 52 weeks | SUV40: 61.3+/-14.5,<br>PLA: 62.0+/-14.6<br><65 years<br>SUV40: 213 (41%)<br>PLA: 107 (42%)<br>≥65 years<br>SUV40: 308 (59%)<br>PLA: 151 (59%)                      | SUV40: 44.9,<br>PLA: 42.3                                                 | SUV40: 91.4,<br>PLA:89.5                                                 | SUV40 mg/d | 522              | SUV40>PLA: sTST,<br>sTSO, sWASO,<br>sNAW, sQUAL,<br>sFRESH, ISI, CGI-S,<br>PGI-S, CGI-I and<br>PGI-I                                                                                         |
|                                                                                            |         |                                                                                                                                                                                                                                      |          |                                                                                                                                                                    |                                                                           |                                                                          | PLA        | 258              |                                                                                                                                                                                              |
| 028 (2014).<br>USA, Europe,<br>Asia, and South<br>Africa.<br>Industry.<br>NCT01097616      | 1022    | Primary insomnia (DSM-IV-TR). age≥18 years. 2-weeks, SB, PLA run-in period (Q-cohort: sTST<6.5 hrs and sTSO>30 mins on ≥ 4 of 7 nights, PQ-cohort: LPS>20 mins and WASO≥60 min on combined nights with neither night≤45 mins.        | 3 months | SUV20: 55+/-16,<br>SUV40: 56+/-15,<br>PLA: 56+/-15<br><65 years<br>SUV20: 147 (57.9%)<br>SUV40: 222 (58.0%)<br>PLA: 223 (58.1%)<br>≥65 years<br>SUV20: 107 (42.1%) | SUV20: 36.2<br>SUV40: 39.9<br>PLA: 36.2                                   | SUV20: 66.1<br>SUV40: 66.1<br>PLA: 63.5                                  | SUV20 mg/d | 254              | all dose>PLA: <u>sTST</u> ,<br><u>sTSO</u> , <u>LPS</u> , <u>WASO</u> ,<br>ISI, CGI-S, PGI-S,<br>CGI-I and PGI-I, only<br>SUV40>PLA: sWASO<br>and sQUAL, all<br>dose=PLA: sNAW and<br>sFRESH |
|                                                                                            |         |                                                                                                                                                                                                                                      |          |                                                                                                                                                                    |                                                                           |                                                                          | SUV40 mg/d | 383              |                                                                                                                                                                                              |
|                                                                                            |         |                                                                                                                                                                                                                                      |          |                                                                                                                                                                    |                                                                           |                                                                          | PLA        | 385              |                                                                                                                                                                                              |

| Study                                                                                               | Total n | Patients                                                                                                                                                                                                                                                                                    | Duration | Age (mean+/-SD)                                                                                                                                                                                                                                                         | Male, %                                 | White (%)                               | Drug                            | n                 | Outcomes <sup>a</sup>                                                                                                                                                     |
|-----------------------------------------------------------------------------------------------------|---------|---------------------------------------------------------------------------------------------------------------------------------------------------------------------------------------------------------------------------------------------------------------------------------------------|----------|-------------------------------------------------------------------------------------------------------------------------------------------------------------------------------------------------------------------------------------------------------------------------|-----------------------------------------|-----------------------------------------|---------------------------------|-------------------|---------------------------------------------------------------------------------------------------------------------------------------------------------------------------|
| 029 (2014).<br>USA, Australia,<br>Europe, Asia,<br>and South<br>Africa.<br>Industry.<br>NCT01097629 | 1019    | Primary insomnia<br>(DSM-IV-TR). age $\geq$ 18 years.<br>2-weeks, SB, PLA run-in<br>period (Q-cohort: sTST $<$ 6.5<br>hrs and sTSO $>$ 30 mins on $\geq$ 4<br>of 7 nights, PQ-cohort:<br>LPS $>$ 20 mins and WASO $\geq$ 60<br>min on combined nights with<br>neither night $\leq$ 45 mins. | 3 months | SUV40: 161 (42.0%)<br>PLA: 161 (41.9%)<br><br>SUV20: 56+/-16,<br>SUV20: 57+/-15,<br>PLA: 57+/-15<br><br><65 years<br>SUV20: 144 (60.3%)<br>SUV40: 229 (59.2%)<br>PLA: 226 (59.0%)<br><br>$\geq$ 65 years<br>SUV20: 95 (39.7%)<br>SUV40: 158 (40.8%)<br>PLA: 157 (41.0%) | SUV20: 34.3<br>SUV40: 31.0<br>PLA: 35.5 | SUV20: 79.5<br>SUV40: 80.1<br>PLA: 80.7 | SUV20 mg/d<br>SUV40 mg/d<br>PLA | 240<br>392<br>387 | all dose $>$ PLA: <u>sTST</u> ,<br><u>sTSO</u> , sWASO,<br>sQUAL, sFRESH,<br><u>WASO</u> , ISI, CGI-S,<br>PGI-S, CGI-I and<br>PGI-I, all dose=PLA:<br><u>LPS</u> and sNAW |

**S2 Table. Study, patient, and treatment characteristics for the analyzed randomized, controlled trials.**

<sup>a</sup> The primary outcome of 009 study was the safety and tolerability of SUV.

Q-cohort: Patients received only subjective assessment, PQ-cohort: Patients received subjective and objective assessment.

CGI-I: Clinical Global Impression-Improvement scale, CGI-S: Clinical Global Impression-Severity scale, d: day, DSM-IV-TR:., hr: hour, ISI: Insomnia Severity Index, LPS: latency to onset of persistent sleep, min: minute, sNAW: (subjective) number of awakenings, PGI-I: Patient Global Impression-Improvement scale, PGI-S: Patient Global Impression-Severity scale, PLA: placebo, PSG: polysomnography, SB: single-blind, SE: sleep efficiency, sFRESH: subjective refreshed feeling on waking, sQUAL: subjective quality of sleep, TSO: subjective time to sleep onset, (s)TST: (subjective) total sleep time, SUV: suvorexant, (s)WASO: (subjective) wakefulness after persistent sleep onset,
